# Supplementary material for: 5-Nitrofuran-Tagged Oxazolyl Pyrazolopiperidines: Synthesis and Activity against ESKAPE Pathogens
Source: MDPI journal article supplement (doi:10.3390/molecules28186491), 2023-09-07

## Supporting information

# 5-Nitrofurant-Tagged Oxazolyl Pyrazolopiperidines: Synthesis and Activity against ESKAPE Pathogens

Elizaveta Rogacheva <sup>1</sup>, Lyudmila Kraeva <sup>1</sup>, Alexey Lukin <sup>2</sup>, Lyubov Vinogradova <sup>2</sup>, Kristina Komarova <sup>2</sup>, Mikhail Chudinov <sup>2\*</sup>, Maxim Gureev <sup>3,4</sup>, and Evgeny Chupakhin <sup>5</sup>

<sup>1</sup> Pasteur Institute of Epidemiology and Microbiology, Saint Petersburg 197101, Russia

<sup>2</sup> Lomonosov Institute of Fine Chemical Technologies, MIREA – Russian Technological University, Moscow 119454, Russia

<sup>3</sup> Laboratory of Bio- and chemoinformatics, I. M. Sechenov First Moscow State Medical University, Moscow 119991, Russia

<sup>4</sup> Molecular modeling lab, HSE University, Saint-Petersburg, 190121, Russia

<sup>5</sup> Immanuel Kant Baltic Federal University, Kaliningrad 236041, Russia.

\* Correspondence: chudinov@mirea.ru

## NMR spectra of synthesized compounds

|                                                                                                                       |        |
|-----------------------------------------------------------------------------------------------------------------------|--------|
| 5-tert-butyl 3-ethyl 1-methyl-1,4,6,7-tetrahydro-5H-pyrazolo[4,3-c]pyridine-3,5- dicarboxylate (6a) .....             | 3      |
| 5-tert-butyl 3-ethyl 1-ethyl-1,4,6,7-tetrahydro-5H-pyrazolo[4,3-c]pyridine-3,5-dicarboxylate (6b) .....               | 4      |
| 5-tert-butyl-3-ethyl-1-(propan-2-yl)-1,4,6,7-tetrahydro-5H-pyrazolo[4,3-c]pyridine-3,5- dicarboxylate (6c).....       | 5      |
| 5-tert-butyl-3-ethyl-1-(2-methylpropyl)-1,4,6,7-tetrahydro-5H-pyrazolo[4,3-c]pyridine-3,5- dicarboxylate (6d) .....   | 6      |
| 5-tert-butyl-3-ethyl-1-(cyclopropylmethyl)-1,4,6,7-tetrahydro-5H-pyrazolo[4,3-c]pyridine-3,5- dicarboxylate (6e)..... | 7      |
| 5-tert-butyl-3-ethyl-1- propyl -1,4,6,7-tetrahydro-5H-pyrazolo[4,3-c]pyridine-3,5-dicarboxylate (6f) .....            | 8      |
| 5-tert-butyl-3-ethyl-1-(2-methoxyethyl)-1,4,6,7-tetrahydro-5H-pyrazolo[4,3-c]pyridine-3,5- dicarboxylate (6g).....    | 9      |
| 5-tert-butyl-3-ethyl-1-(2-methoxypropyl)-1,4,6,7-tetrahydro-5H-pyrazolo[4,3-c]pyridine-3,5- dicarboxylate (6h) .....  | 10     |
| 1-methyl-3-(5-methyl-1,3-oxazol-2-yl)-4,5,6,7-tetrahydro-1H-pyrazolo[4,3-c]pyridine hydrochloride .....               | (9a)11 |
| 1-ethyl-3-(5-methyl-1,3-oxazol-2-yl)-4,5,6,7-tetrahydro-1H-pyrazolo[4,3-c]pyridine hydrochloride (9b) .....           | 12     |
| 3-(5-methyl-1,3-oxazol-2-yl)-1-(propan-2-yl)-4,5,6,7-tetrahydro-1H-pyrazolo[4,3-c]pyridine hydrochloride (9c) .....   | 13     |
| 3-(5-methyl-1,3-oxazol-2-yl)-1-(2-methylpropyl)-4,5,6,7-tetrahydro-1H-pyrazolo[4,3-c]pyridine hydrochloride (9d)..... | 14     |
| tert-butyl 1-(cyclopropylmethyl)-3-formyl-1,4,6,7-tetrahydro-5H-pyrazolo[4,3-c]pyridine-5- carboxylate (11e) .....    | 15     |
| tert-butyl 3-formyl-1-propyl-1,4,6,7-tetrahydro-5H-pyrazolo[4,3-c]pyridine-5-carboxylate (11f) .....                  | 16     |
| tert-butyl 3-formyl-1-(2-methoxyethyl)-1,4,6,7-tetrahydro-5H-pyrazolo[4,3-c]pyridine-5-carboxylate (11g) .....        | 17     |

|                                                                                                                                    |    |
|------------------------------------------------------------------------------------------------------------------------------------|----|
| tert-butyl 3-formyl-1-(3-methoxypropyl)-1,4,6,7-tetrahydro-5H-pyrazolo[4,3-c]pyridine-5-carboxylate (11h) .....                    | 18 |
| 1-(cyclopropylmethyl)-3-(1,3-oxazol-5-yl)-4,5,6,7-tetrahydro-1H-pyrazolo[4,3-c]pyridine hydrochloride (12e) .....                  | 19 |
| 3-(1,3-oxazol-5-yl)-1-propyl-4,5,6,7-tetrahydro-1H-pyrazolo[4,3-c]pyridine hydrochloride (12f) .....                               | 20 |
| 1-(2-methoxyethyl)-3-(1,3-oxazol-5-yl)-4,5,6,7-tetrahydro-1H-pyrazolo[4,3-c]pyridine hydrochloride (12g) .....                     | 21 |
| 1-(3-methoxypropyl)-3-(1,3-oxazol-5-yl)-4,5,6,7-tetrahydro-1H-pyrazolo[4,3-c]pyridine hydrochloride (12h) .....                    | 22 |
| 1-methyl-3-(5-methyl-1,3-oxazol-2-yl)-5-(5-nitro-2-furoyl)-4,5,6,7-tetrahydro-1H-pyrazolo [4,3-c]pyridine, LK01510 (10a) .....     | 23 |
| 1-ethyl-3-(5-methyl-1,3-oxazol-2-yl)-5-(5-nitro-2-furoyl)-4,5,6,7-tetrahydro-1H-pyrazolo [4,3-c]pyridine, LK01511 (10b) .....      | 24 |
| 1-isopropyl-3-(5-methyl-1,3-oxazol-2-yl)-5-(5-nitro-2-furoyl)-4,5,6,7-tetrahydro-1H-pyrazolo [4,3-c]pyridine, LK01515 (10c) .....  | 25 |
| 1-isobutyl-3-(5-methyl-1,3-oxazol-2-yl)-5-(5-nitro-2-furoyl)-4,5,6,7-tetrahydro-1H-pyrazolo [4,3-c]pyridine, LK01516 (10d) .....   | 26 |
| 1-(cyclopropylmethyl)-5-(5-nitro-2-furoyl)-3-(1,3-oxazol-5-yl)-4,5,6,7-tetrahydro-1H-pyrazolo [4,3-c]pyridine, LK01512 (13e) ..... | 27 |
| 5-(5-nitro-2-furoyl)-3-(1,3-oxazol-5-yl)-1-propyl-4,5,6,7-tetrahydro-1H-pyrazolo[4,3-c]pyridine, LK01513 (13f) .....               | 28 |
| 1-(2-methoxyethyl)-5-(5-nitro-2-furoyl)-3-(1,3-oxazol-5-yl)-4,5,6,7-tetrahydro-1H-pyrazolo [4,3-c]pyridine, LK01509 (13g) .....    | 29 |
| 1-(3-methoxypropyl)-5-(5-nitro-2-furoyl)-3-(1,3-oxazol-5-yl)-4,5,6,7-tetrahydro-1H-pyrazolo [4,3-c]pyridine, LK01514 (13h) .....   | 30 |

**5-tert-butyl 3-ethyl 1-methyl-1,4,6,7-tetrahydro-5H-pyrazolo[4,3-c]pyridine-3,5- dicarboxylate (6a)**

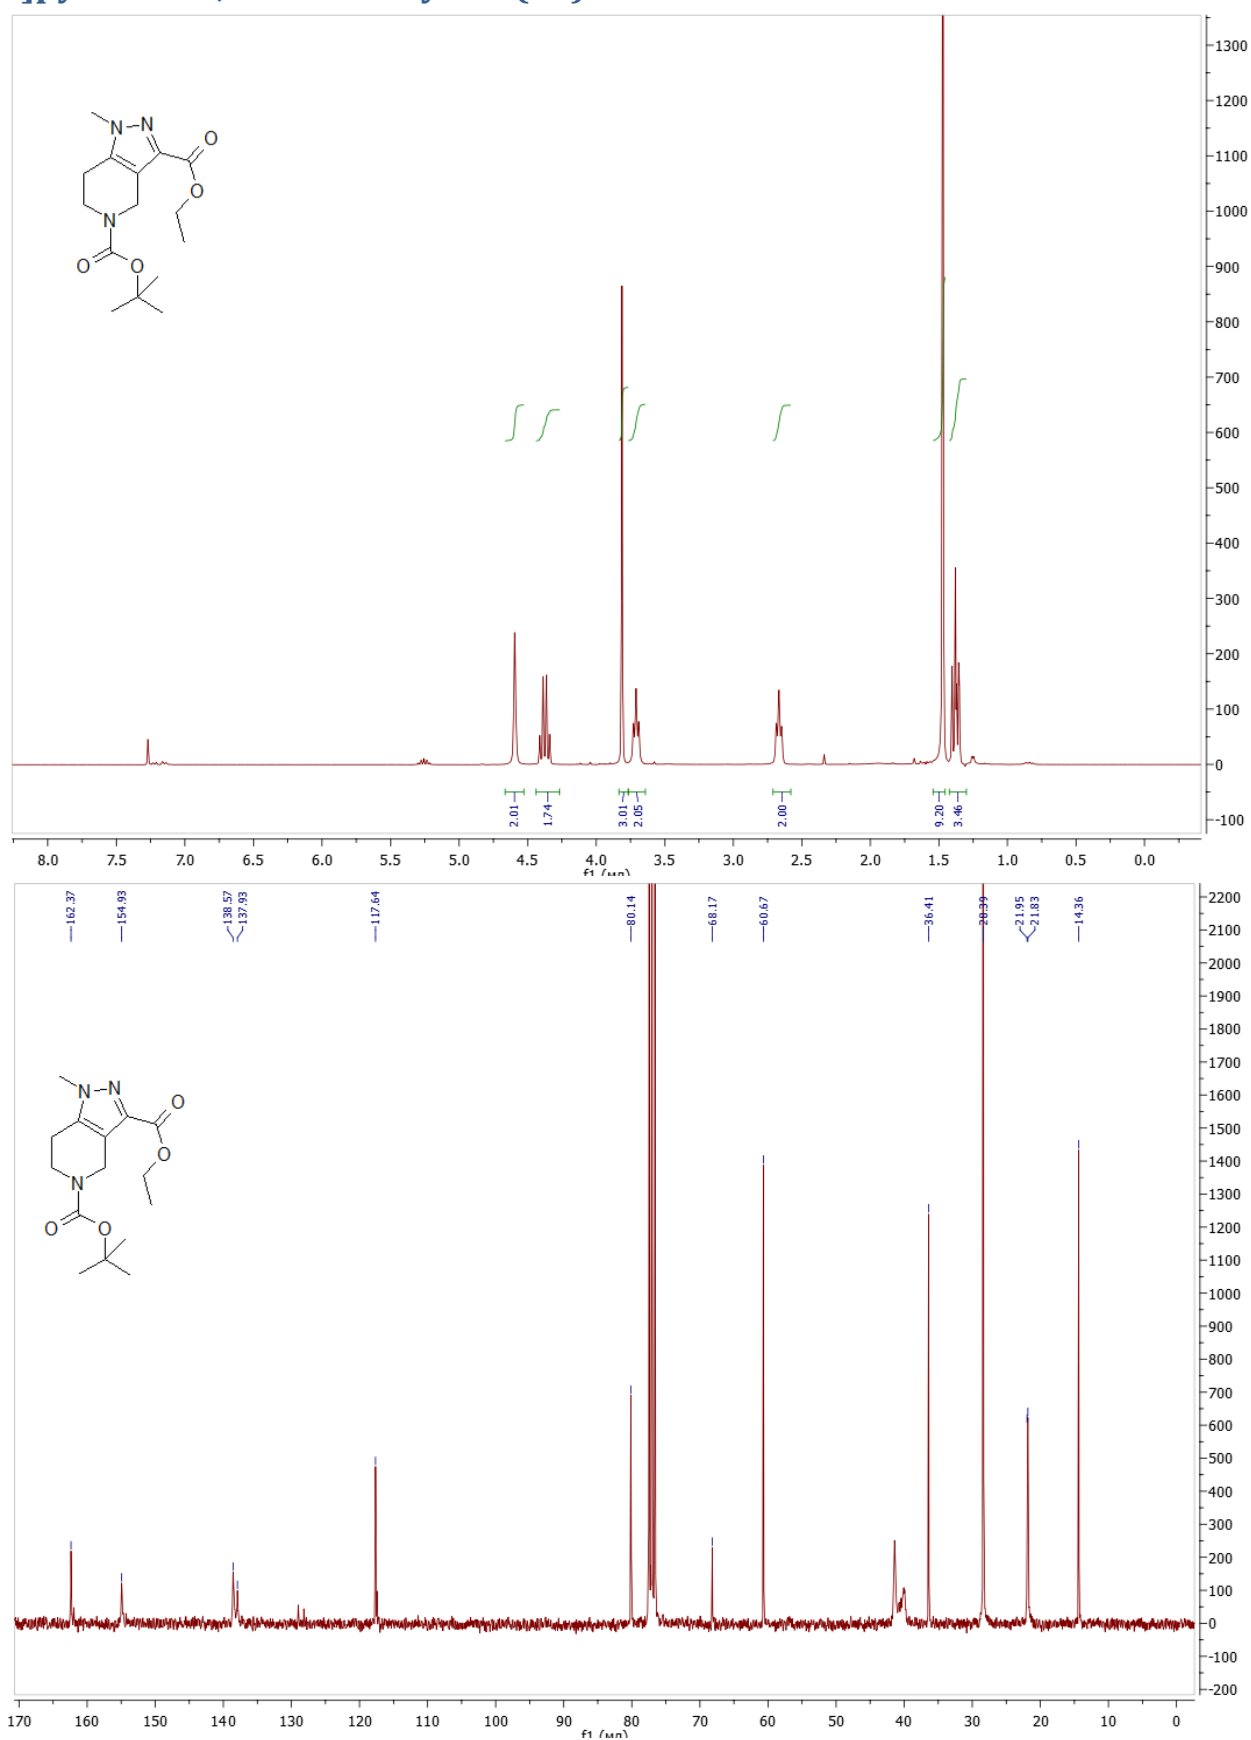

# 5-tert-butyl 3-ethyl 1-ethyl-1,4,6,7-tetrahydro-5H-pyrazolo[4,3-c]pyridine-3,5-dicarboxylate (6b)

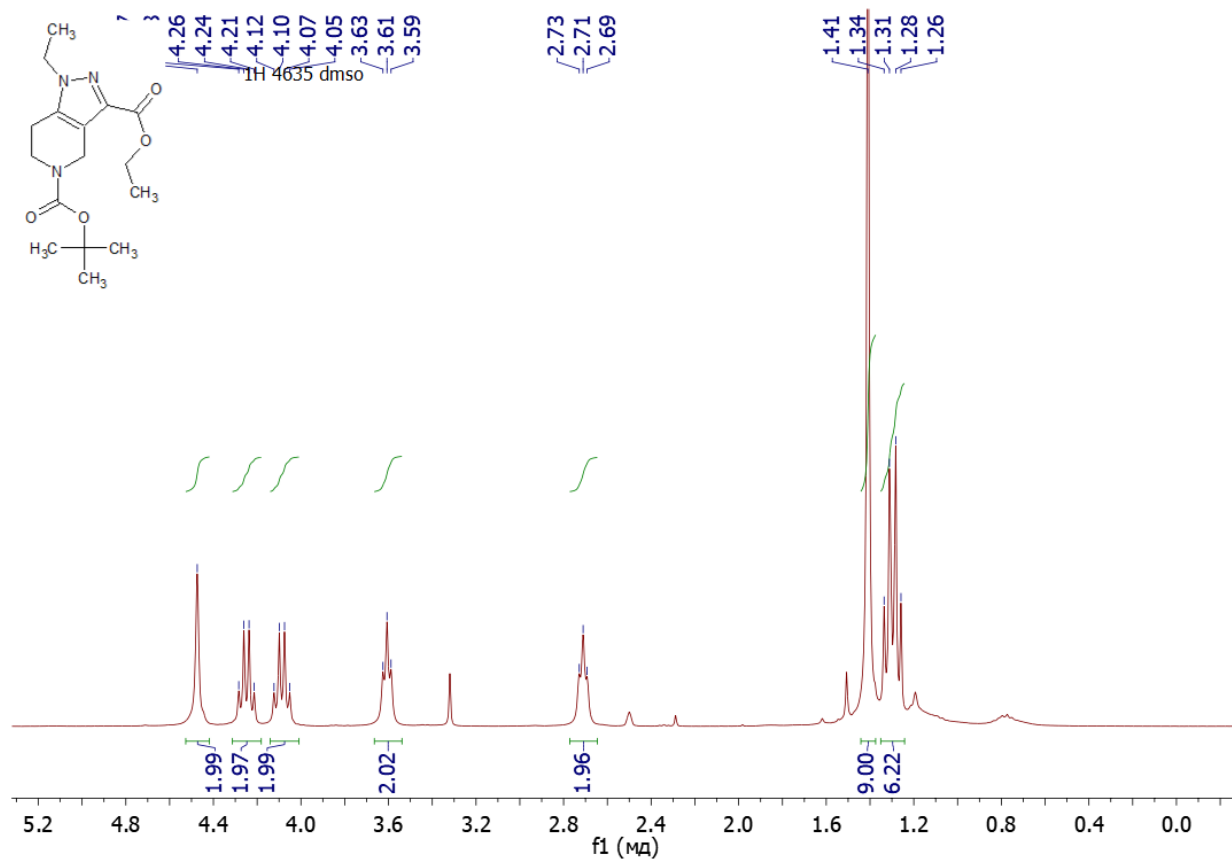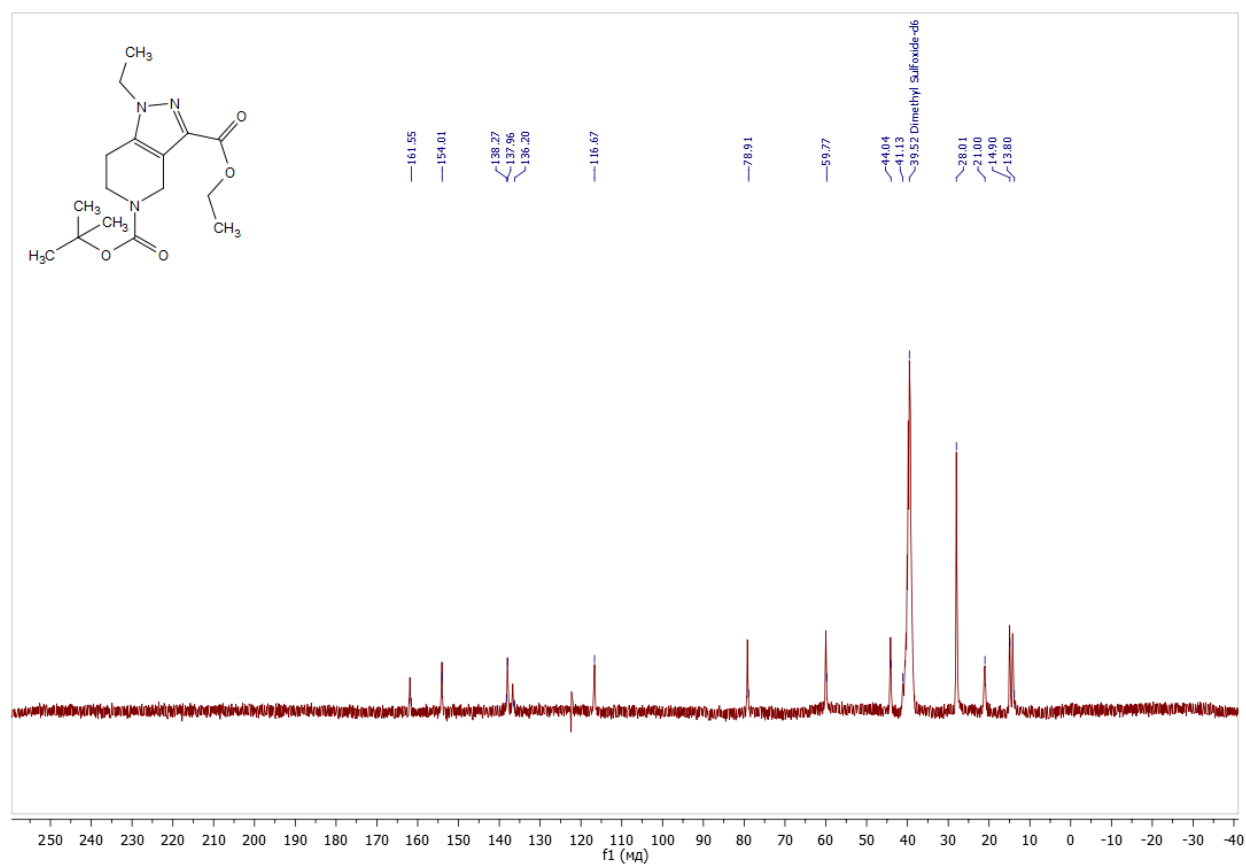

# 5-tert-butyl-3-ethyl-1-(propan-2-yl)-1,4,6,7-tetrahydro-5H-pyrazolo[4,3-c]pyridine-3,5-dicarboxylate (6c)

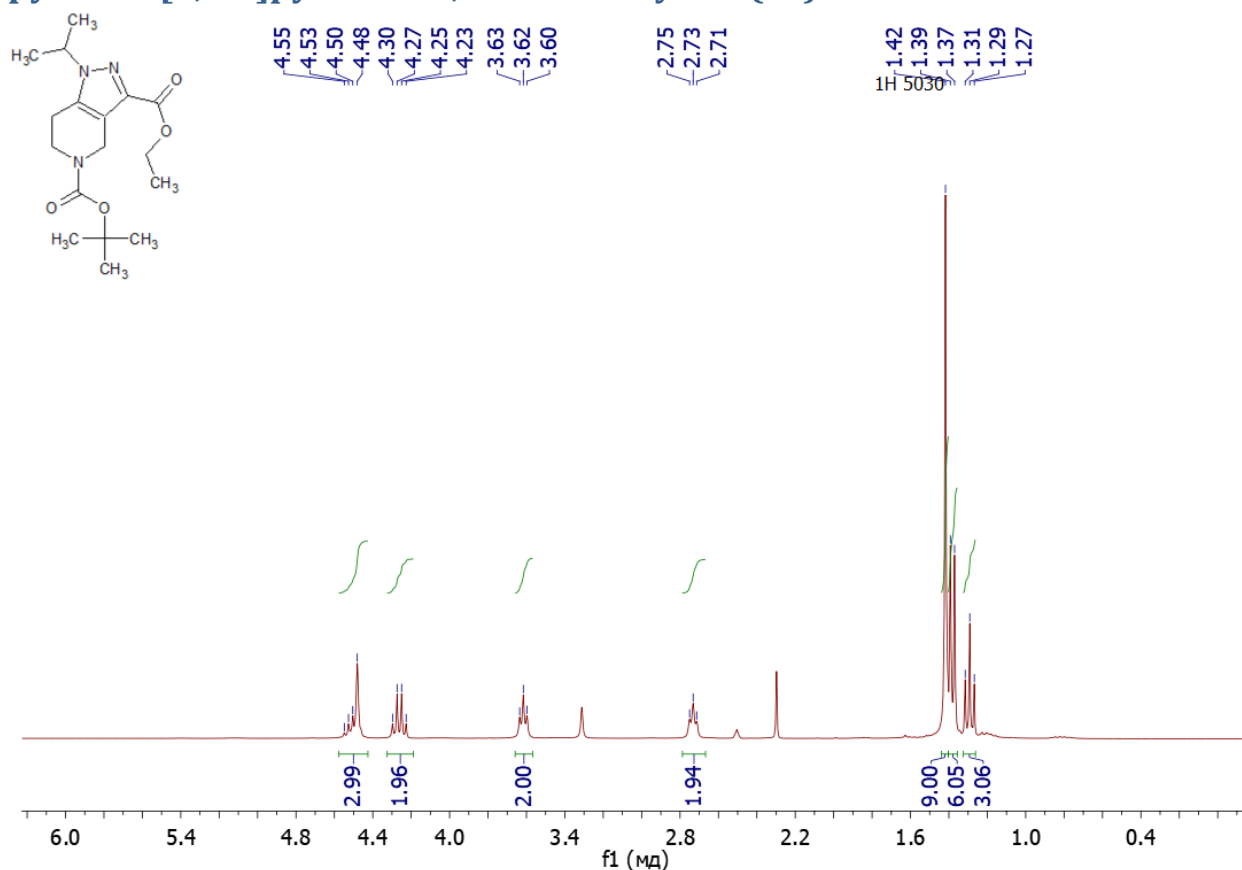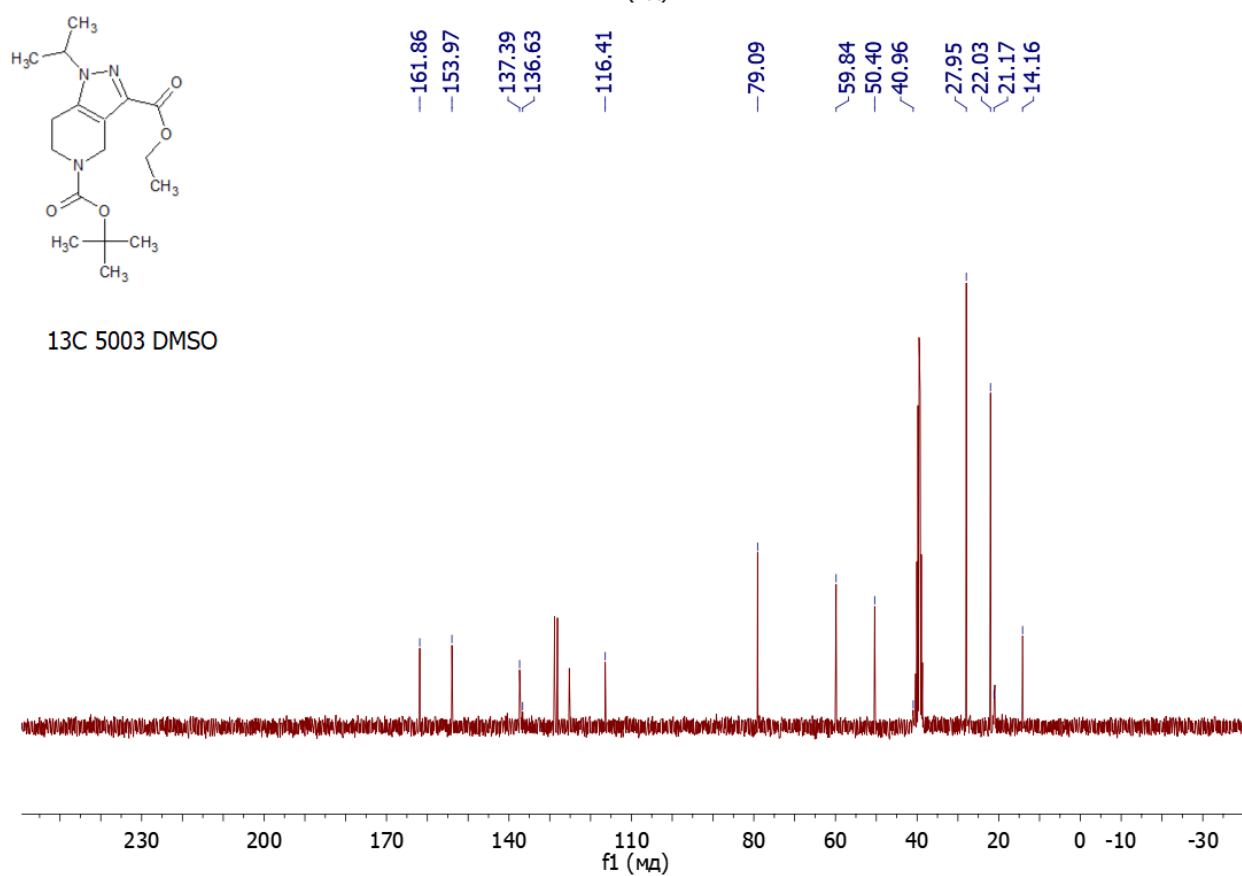

**5-tert-butyl-3-ethyl-1-(2-methylpropyl)-1,4,6,7-tetrahydro-5H-pyrazolo[4,3-c]pyridine-3,5- dicarboxylate (6d)**

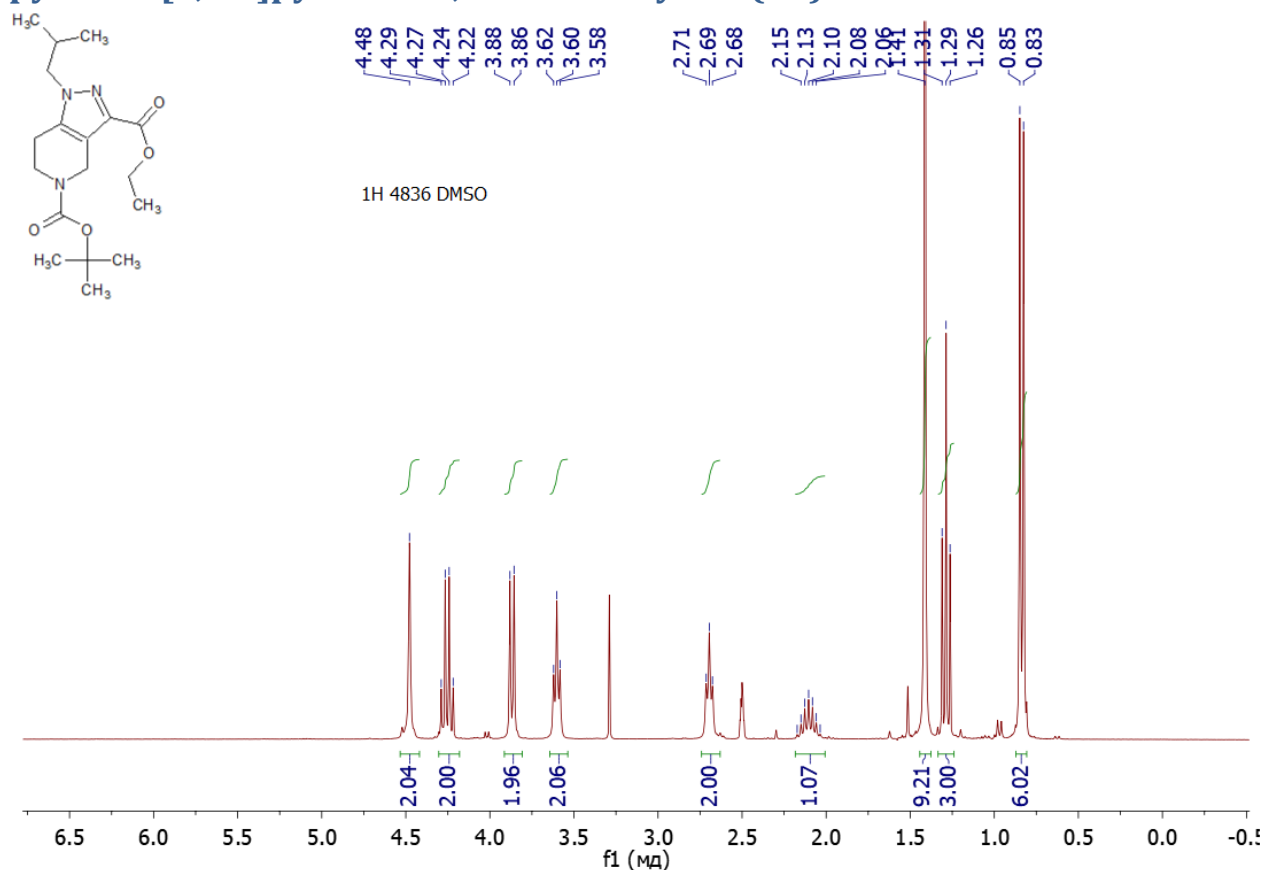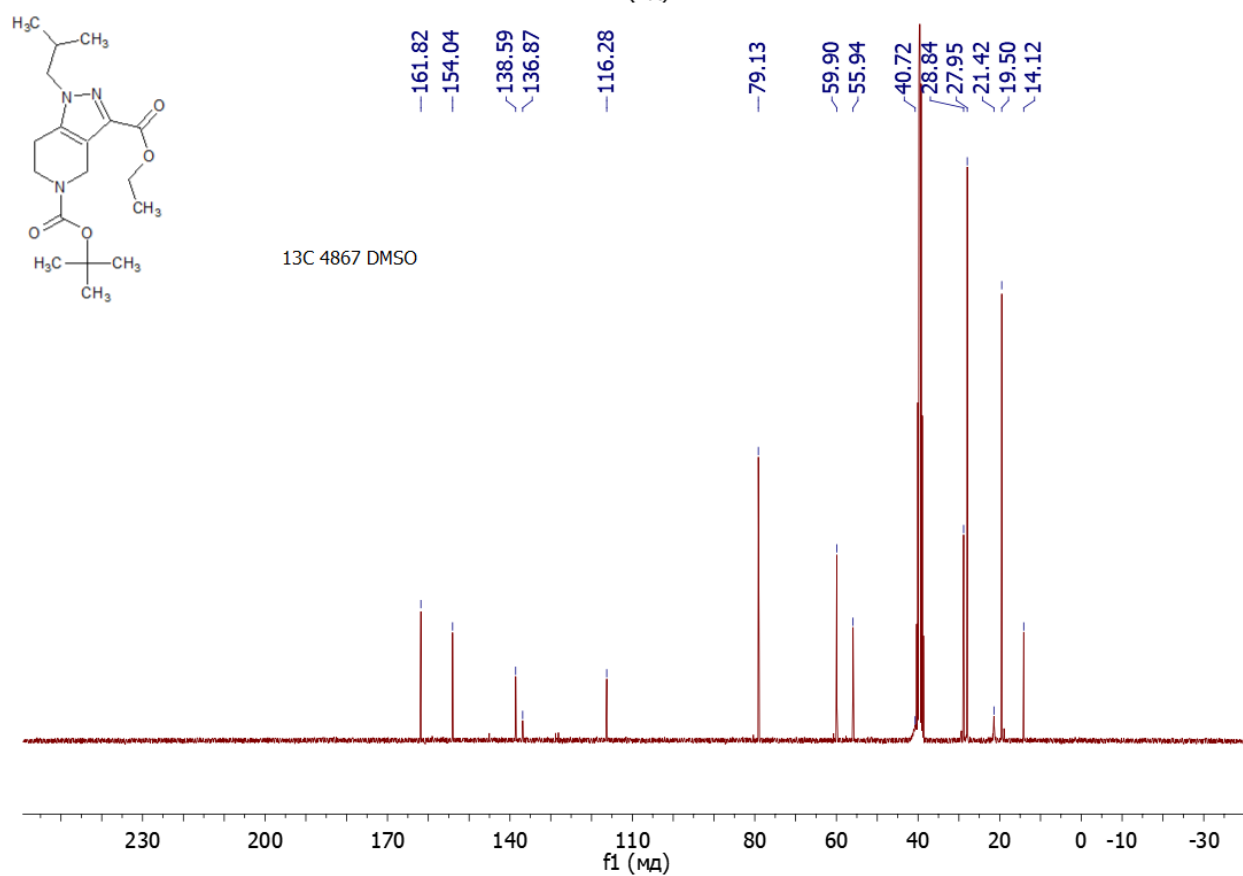

# 5-tert-butyl-3-ethyl-1-(cyclopropylmethyl)-1,4,6,7-tetrahydro-5H-pyrazolo[4,3-c]pyridine-3,5- dicarboxylate (6e)

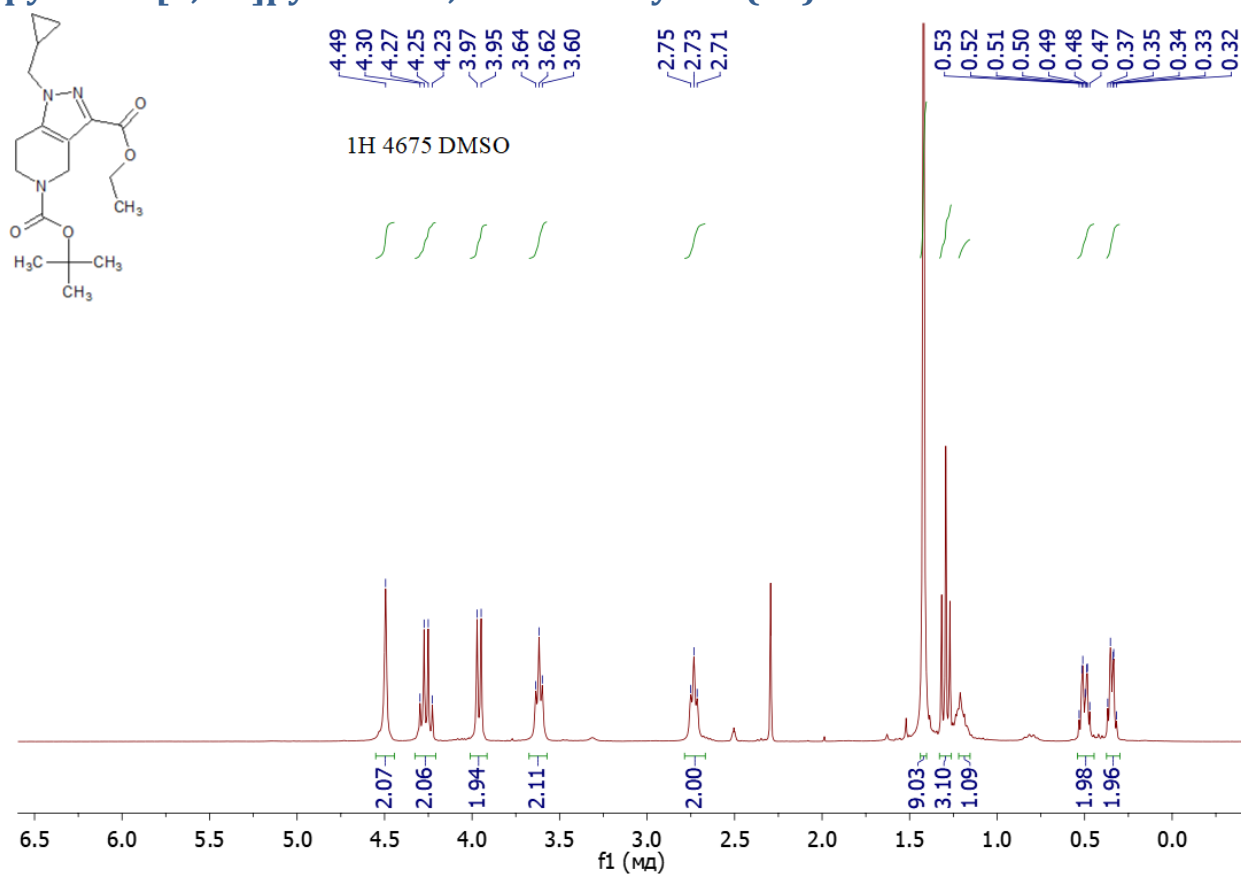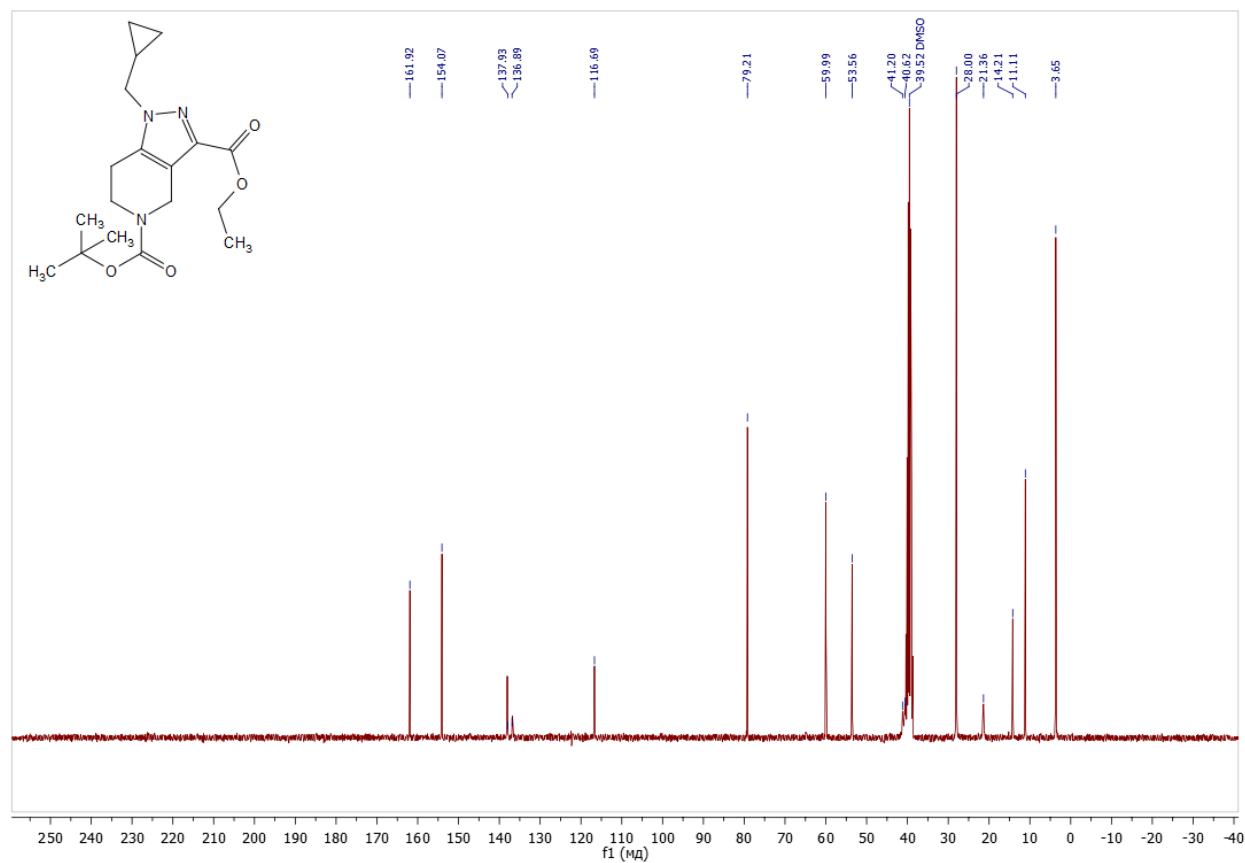

# 5-tert-butyl-3-ethyl-1-propyl-1,4,6,7-tetrahydro-5H-pyrazolo[4,3-c]pyridine-3,5-dicarboxylate (6f)

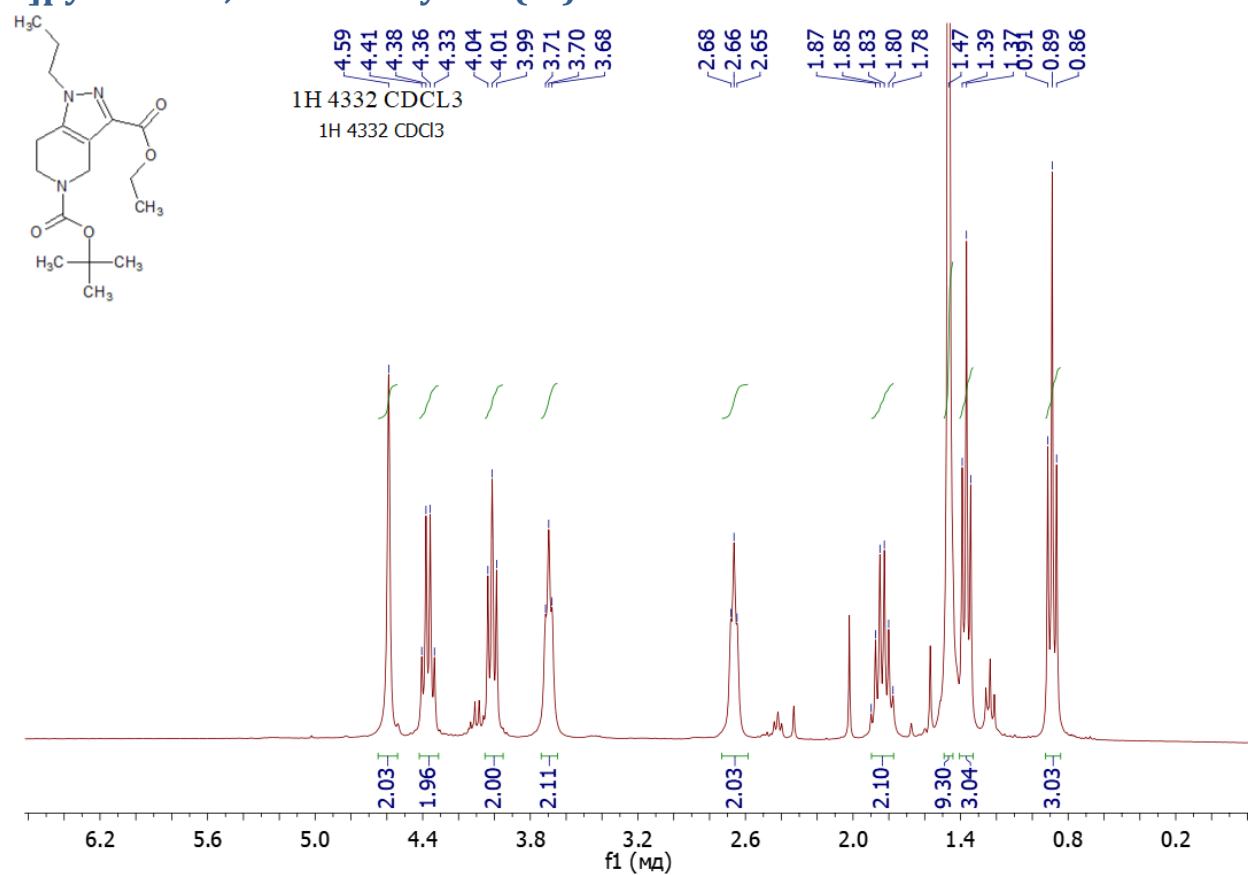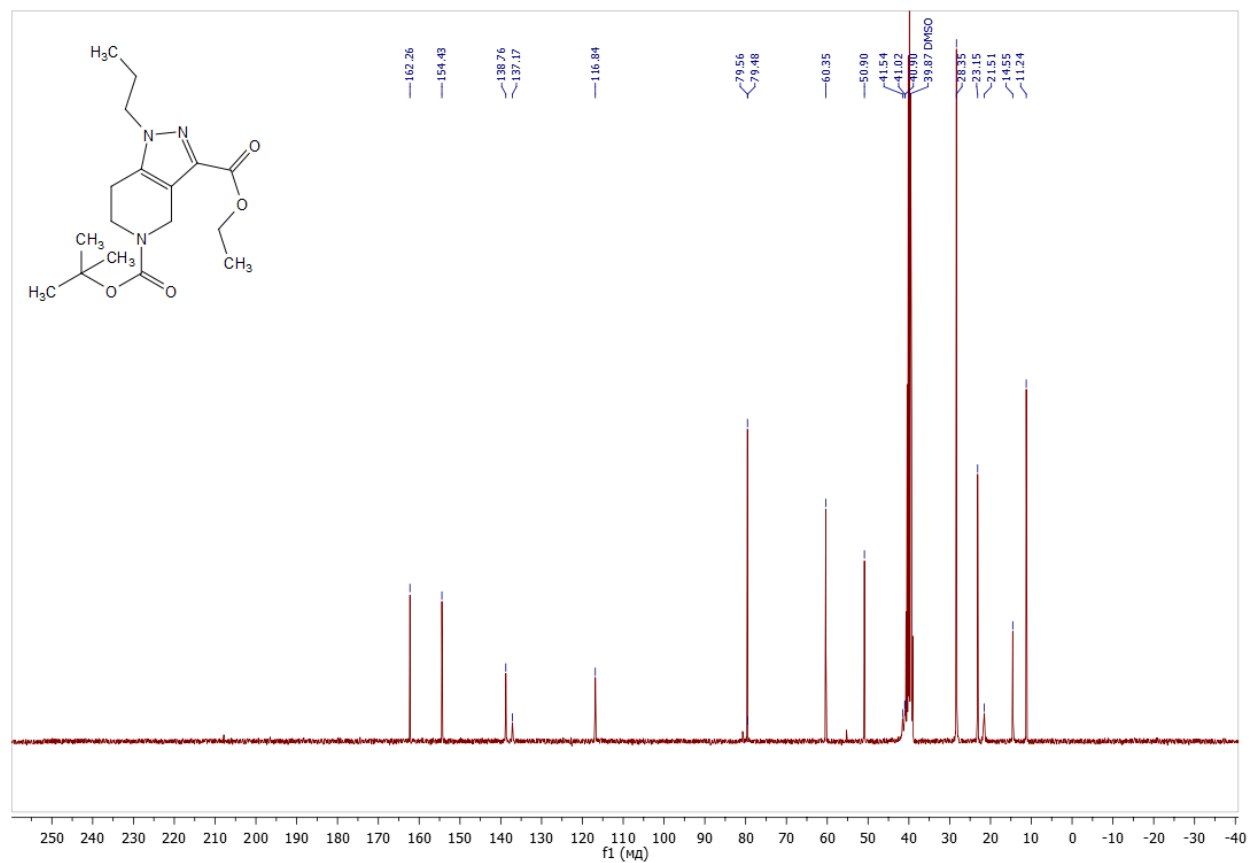



**5-tert-butyl-3-ethyl-1-(2-methoxyethyl)-1,4,6,7-tetrahydro-5H-pyrazolo[4,3-c]pyridine-3,5- dicarboxylate (6g)**

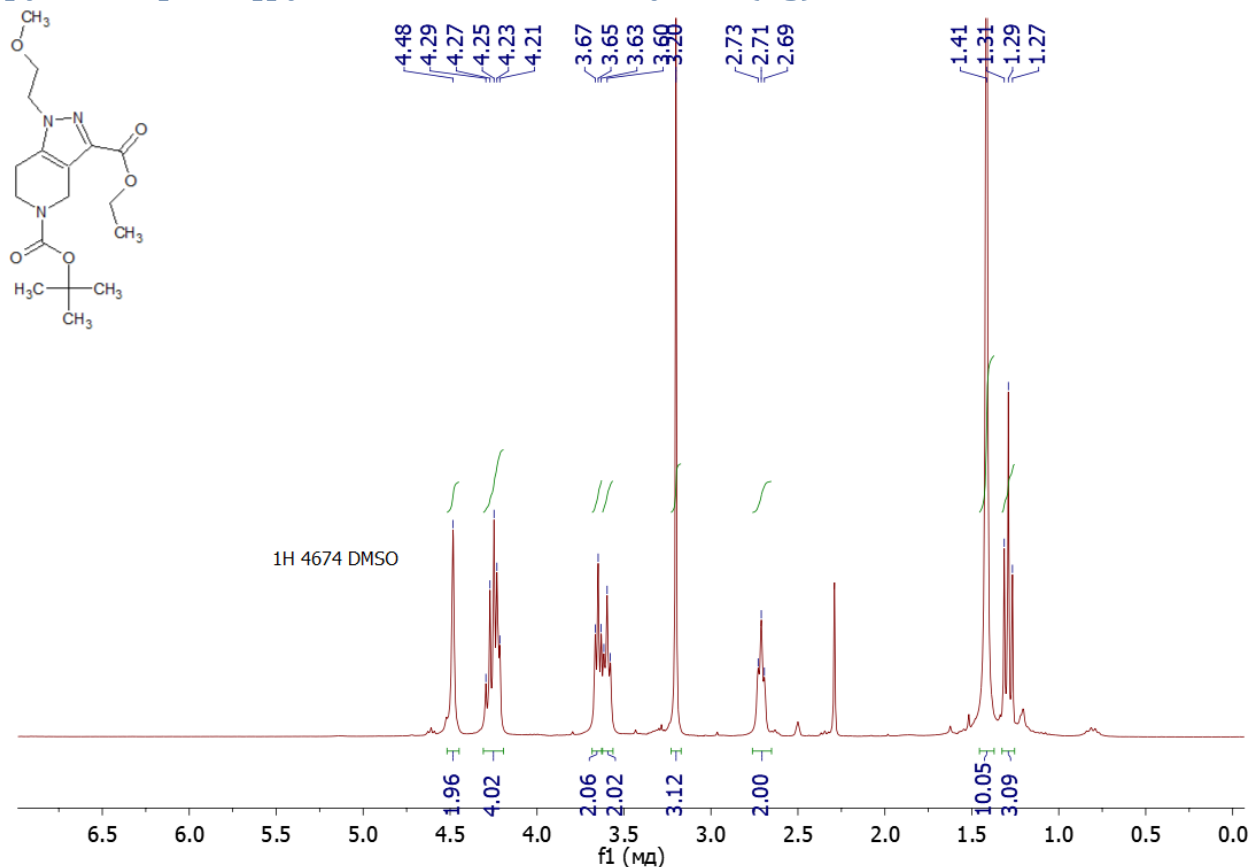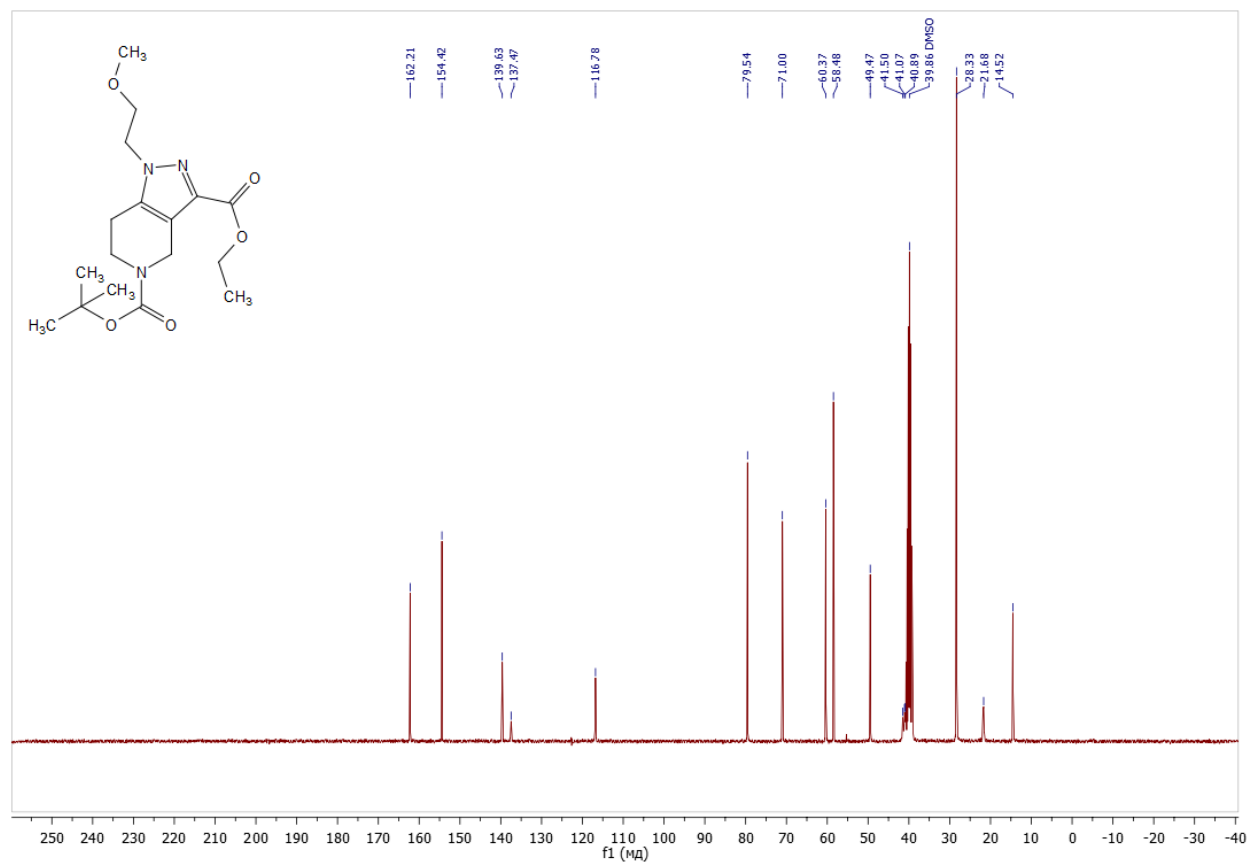

**5-tert-butyl-3-ethyl-1-(2-methoxypropyl)-1,4,6,7-tetrahydro-5H-pyrazolo[4,3-c]pyridine-3,5-dicarboxylate (6h)**

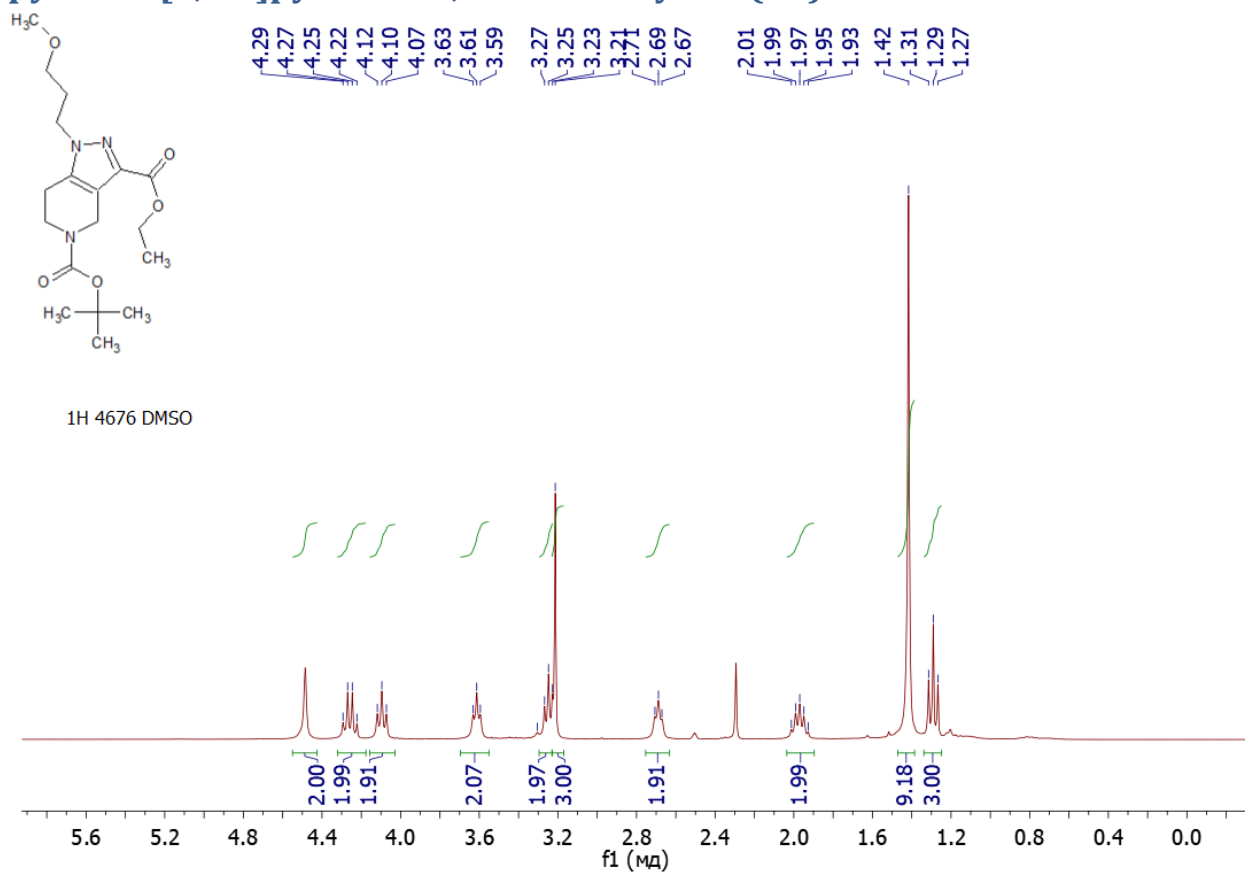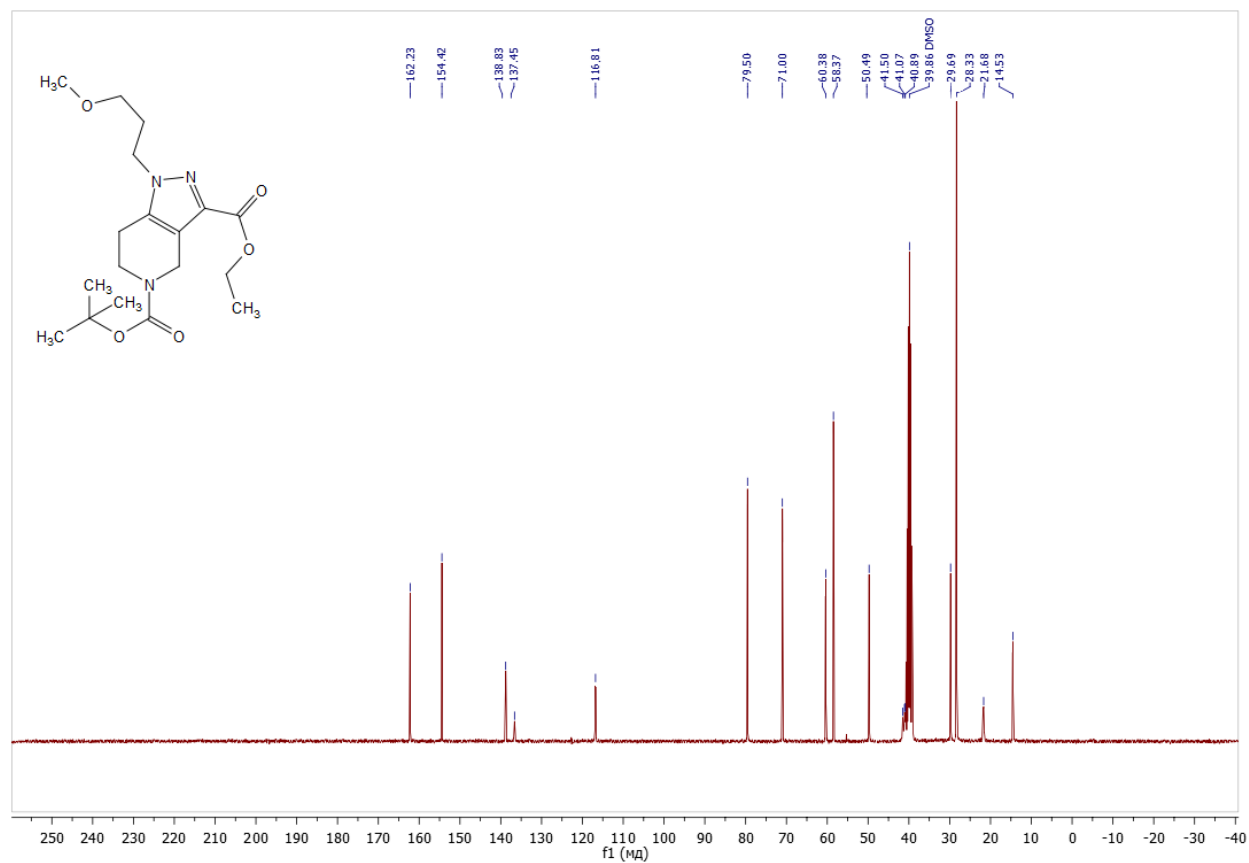

# 1-methyl-3-(5-methyl-1,3-oxazol-2-yl)-4,5,6,7-tetrahydro-1H-pyrazolo[4,3-c]pyridine hydrochloride (9a)

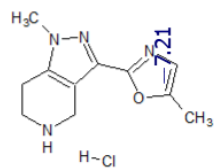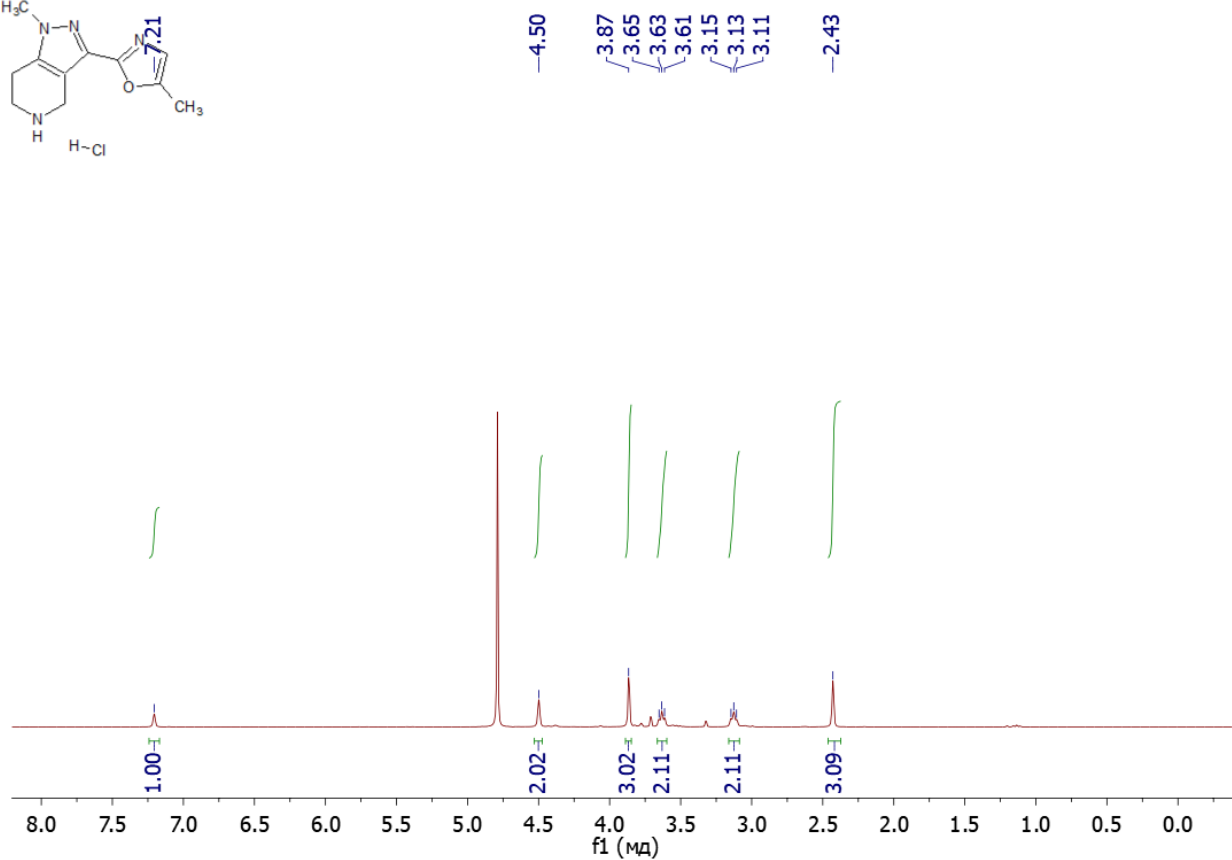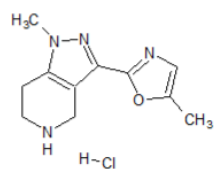

<sup>13</sup>C NMR spectrum (DMSO-d<sub>6</sub>) of compound 9a. The x-axis is chemical shift in ppm (f1) from 0.0 to 200.0. The spectrum shows several peaks with chemical shift values.

| Chemical Shift (ppm) |
|----------------------|
| 155.17               |
| 148.68               |
| 136.93               |
| 135.02               |
| 123.92               |
| 108.85               |
| 39.99                |
| 39.70                |
| 36.50                |
| 18.52                |
| 10.73                |

<sup>13</sup>C 5927 DMSO

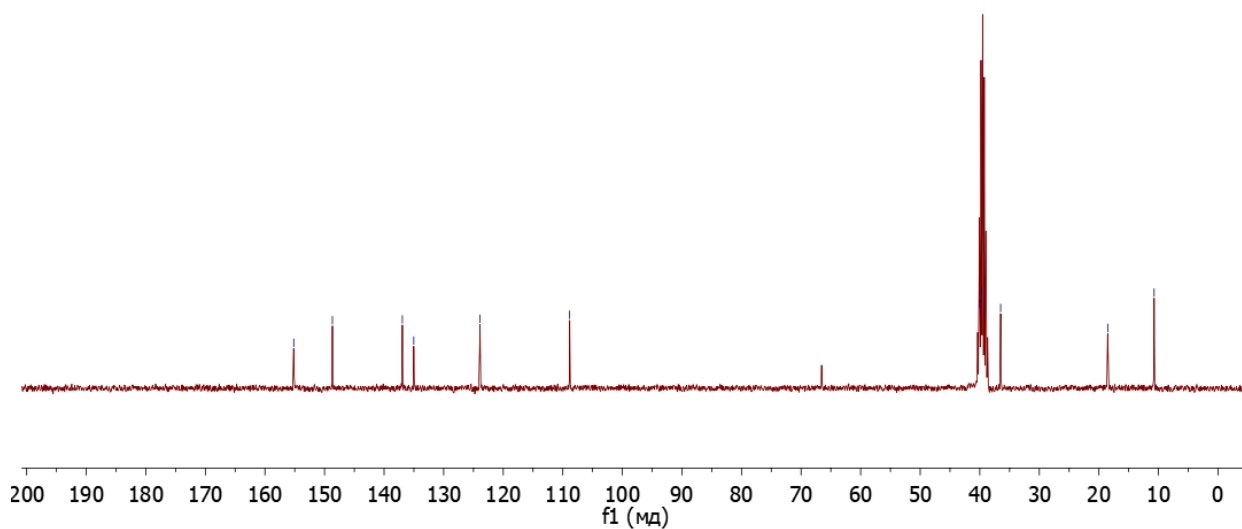

# 1-ethyl-3-(5-methyl-1,3-oxazol-2-yl)-4,5,6,7-tetrahydro-1H-pyrazolo[4,3-c]pyridine hydrochloride (9b)

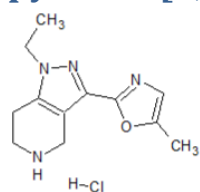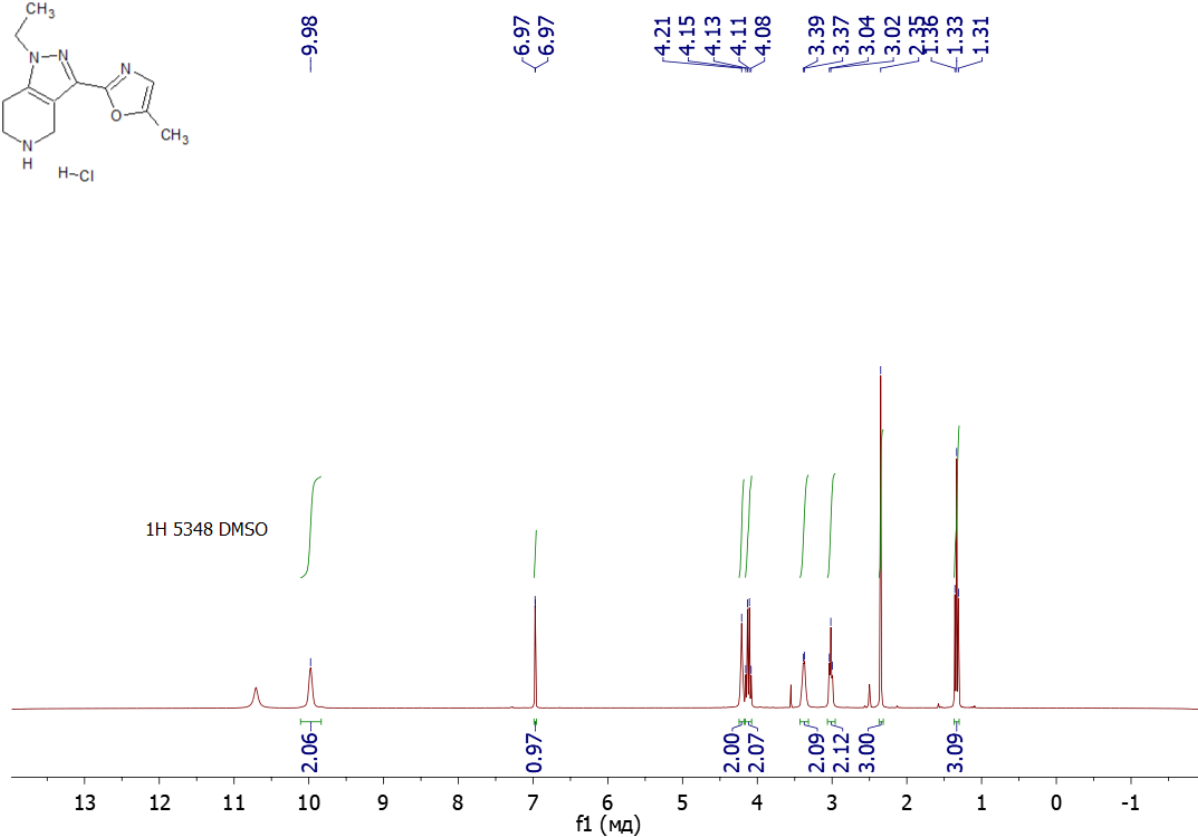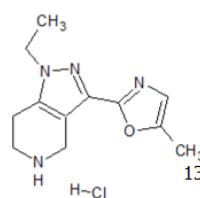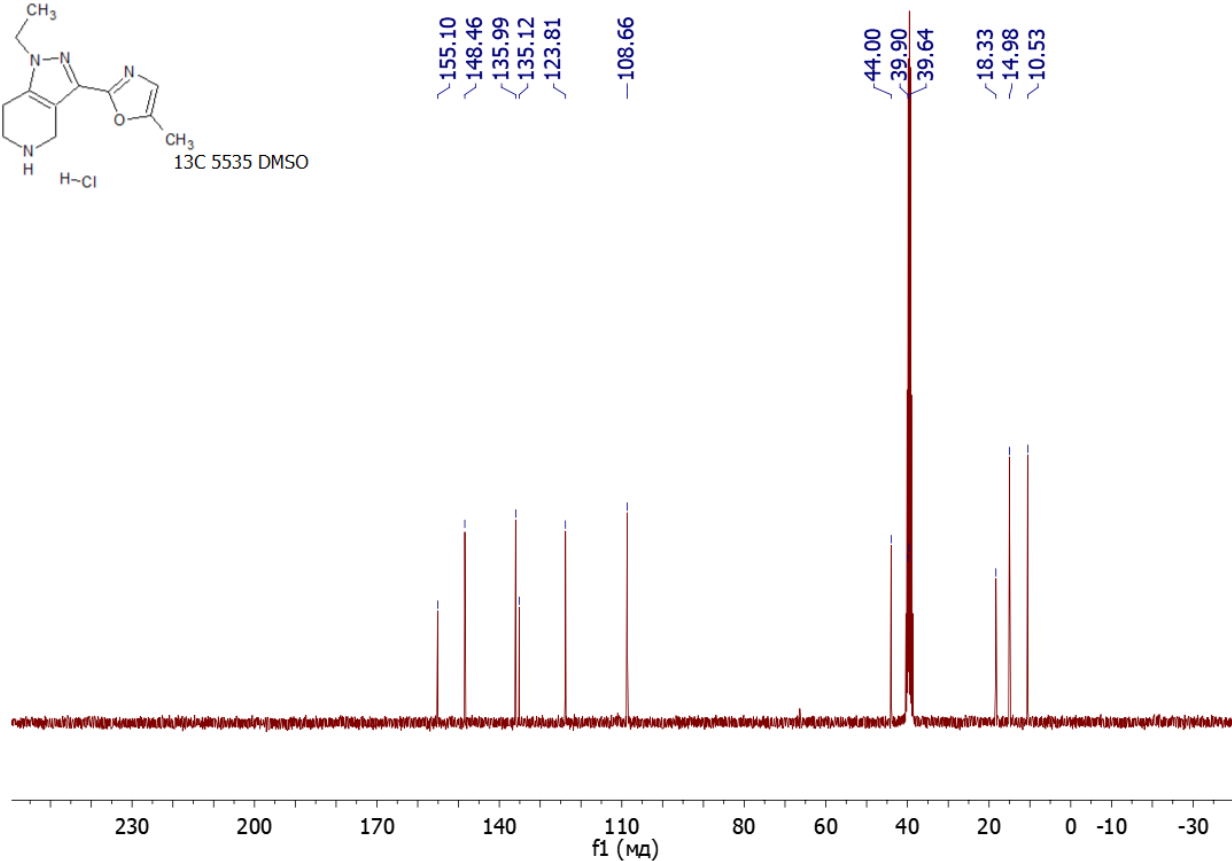

### 3-(5-methyl-1,3-oxazol-2-yl)-1-(propan-2-yl)-4,5,6,7-tetrahydro-1H-pyrazolo[4,3-c]pyridine hydrochloride (9c)

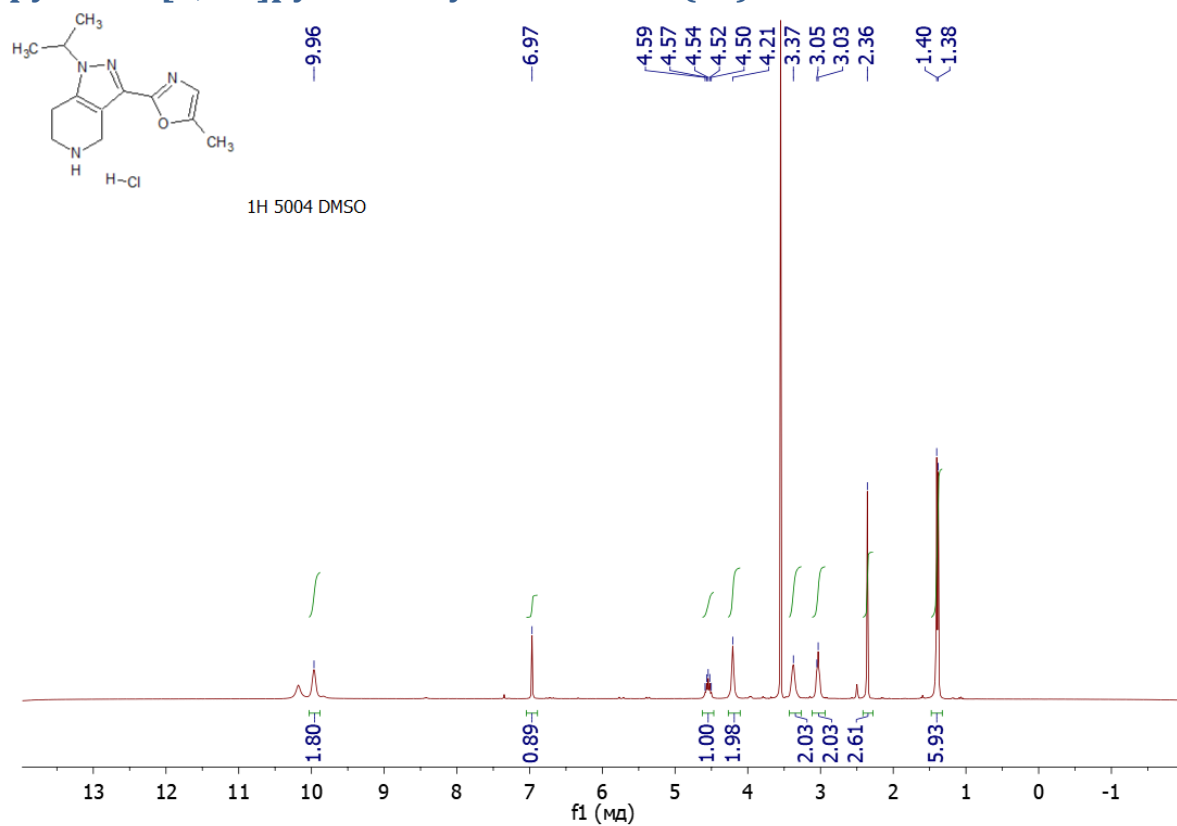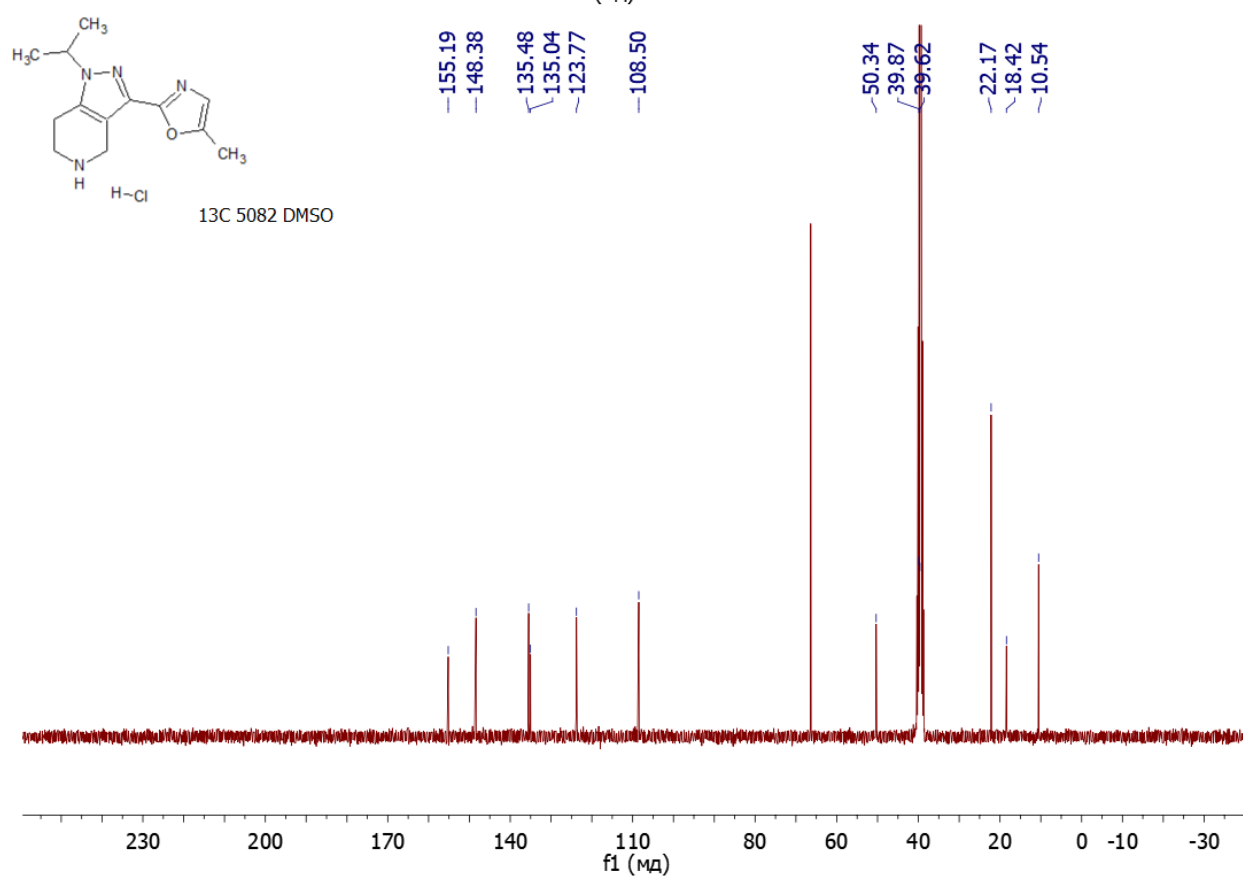

### 3-(5-methyl-1,3-oxazol-2-yl)-1-(2-methylpropyl)-4,5,6,7-tetrahydro-1H-pyrazolo[4,3-c]pyridine hydrochloride (9d)

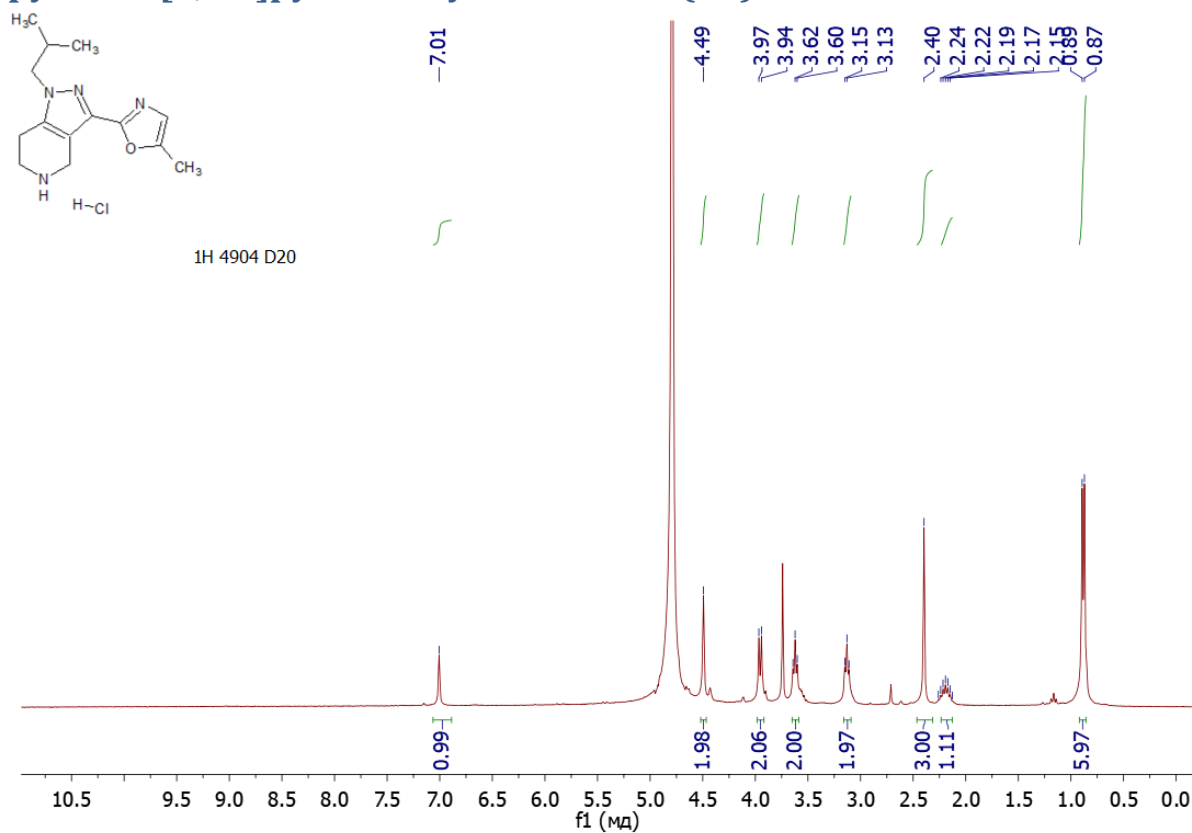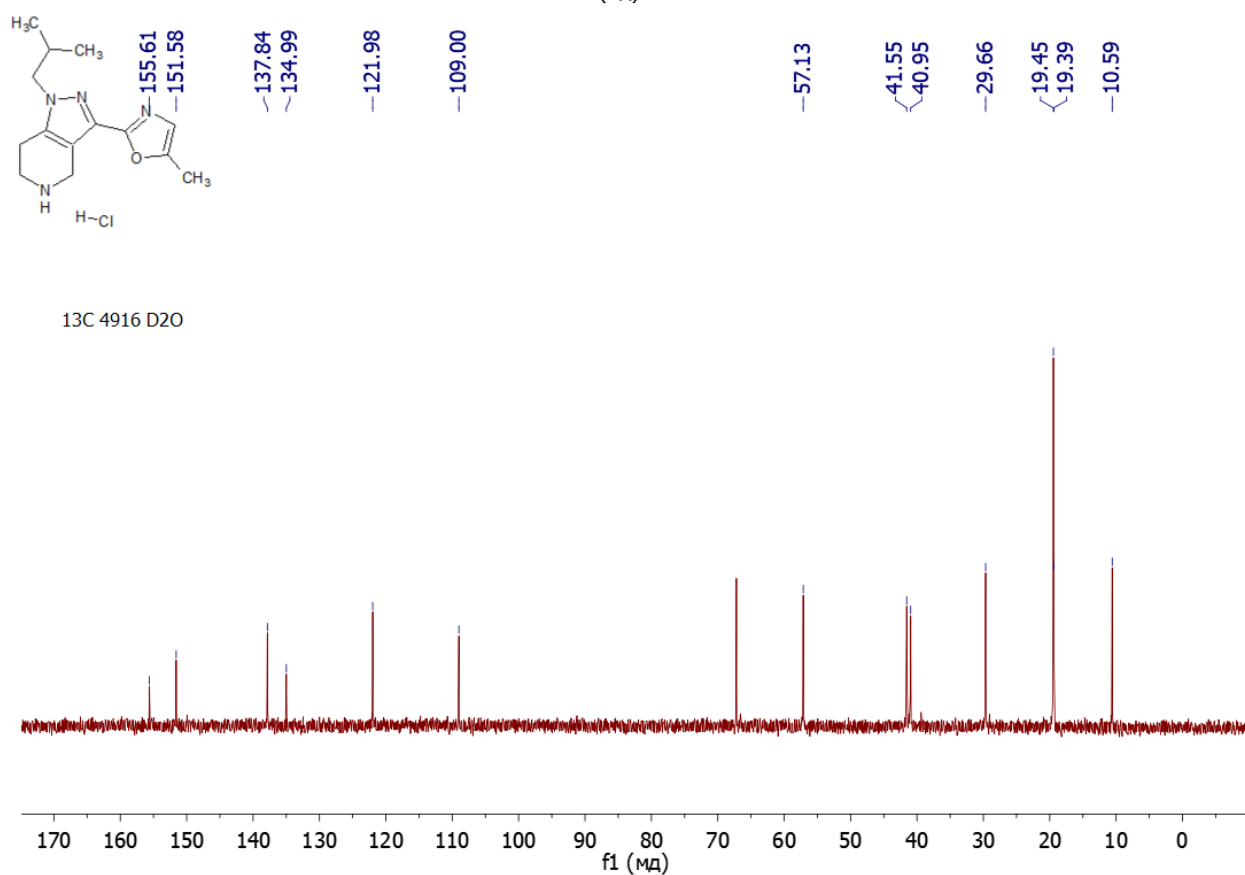

**tert-butyl 1-(cyclopropylmethyl)-3-formyl-1,4,6,7-tetrahydro-5H-pyrazolo[4,3-c]pyridine-5- carboxylate (11e)**

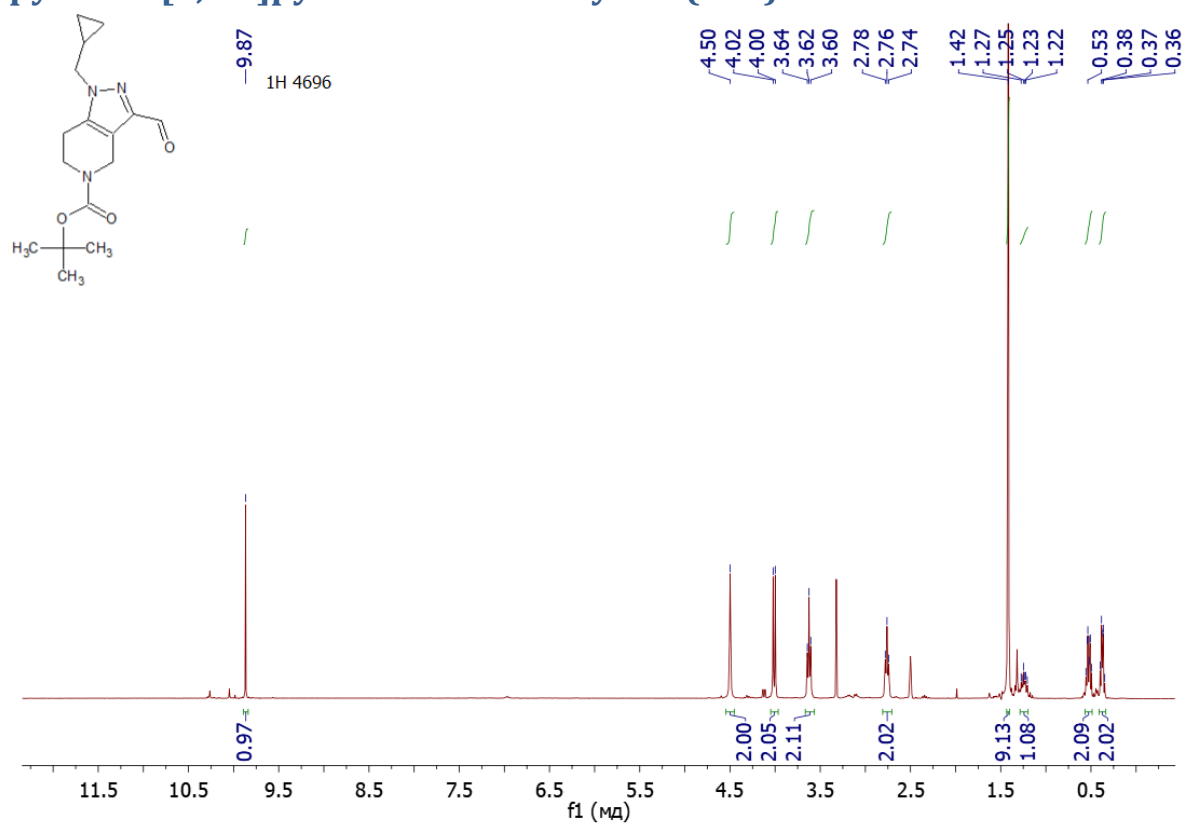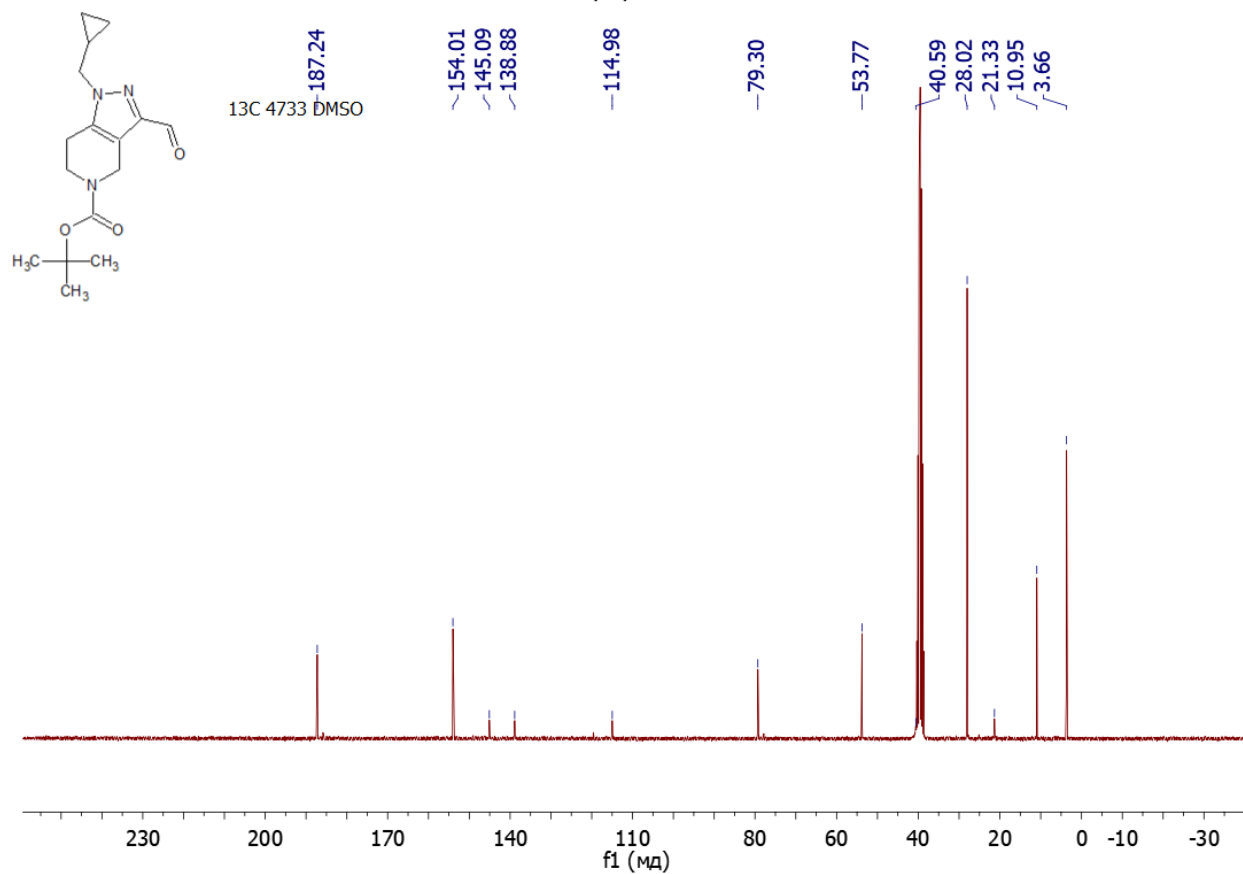

**tert-butyl 3-formyl-1-propyl-1,4,6,7-tetrahydro-5H-pyrazolo[4,3-c]pyridine-5-carboxylate (11f)**

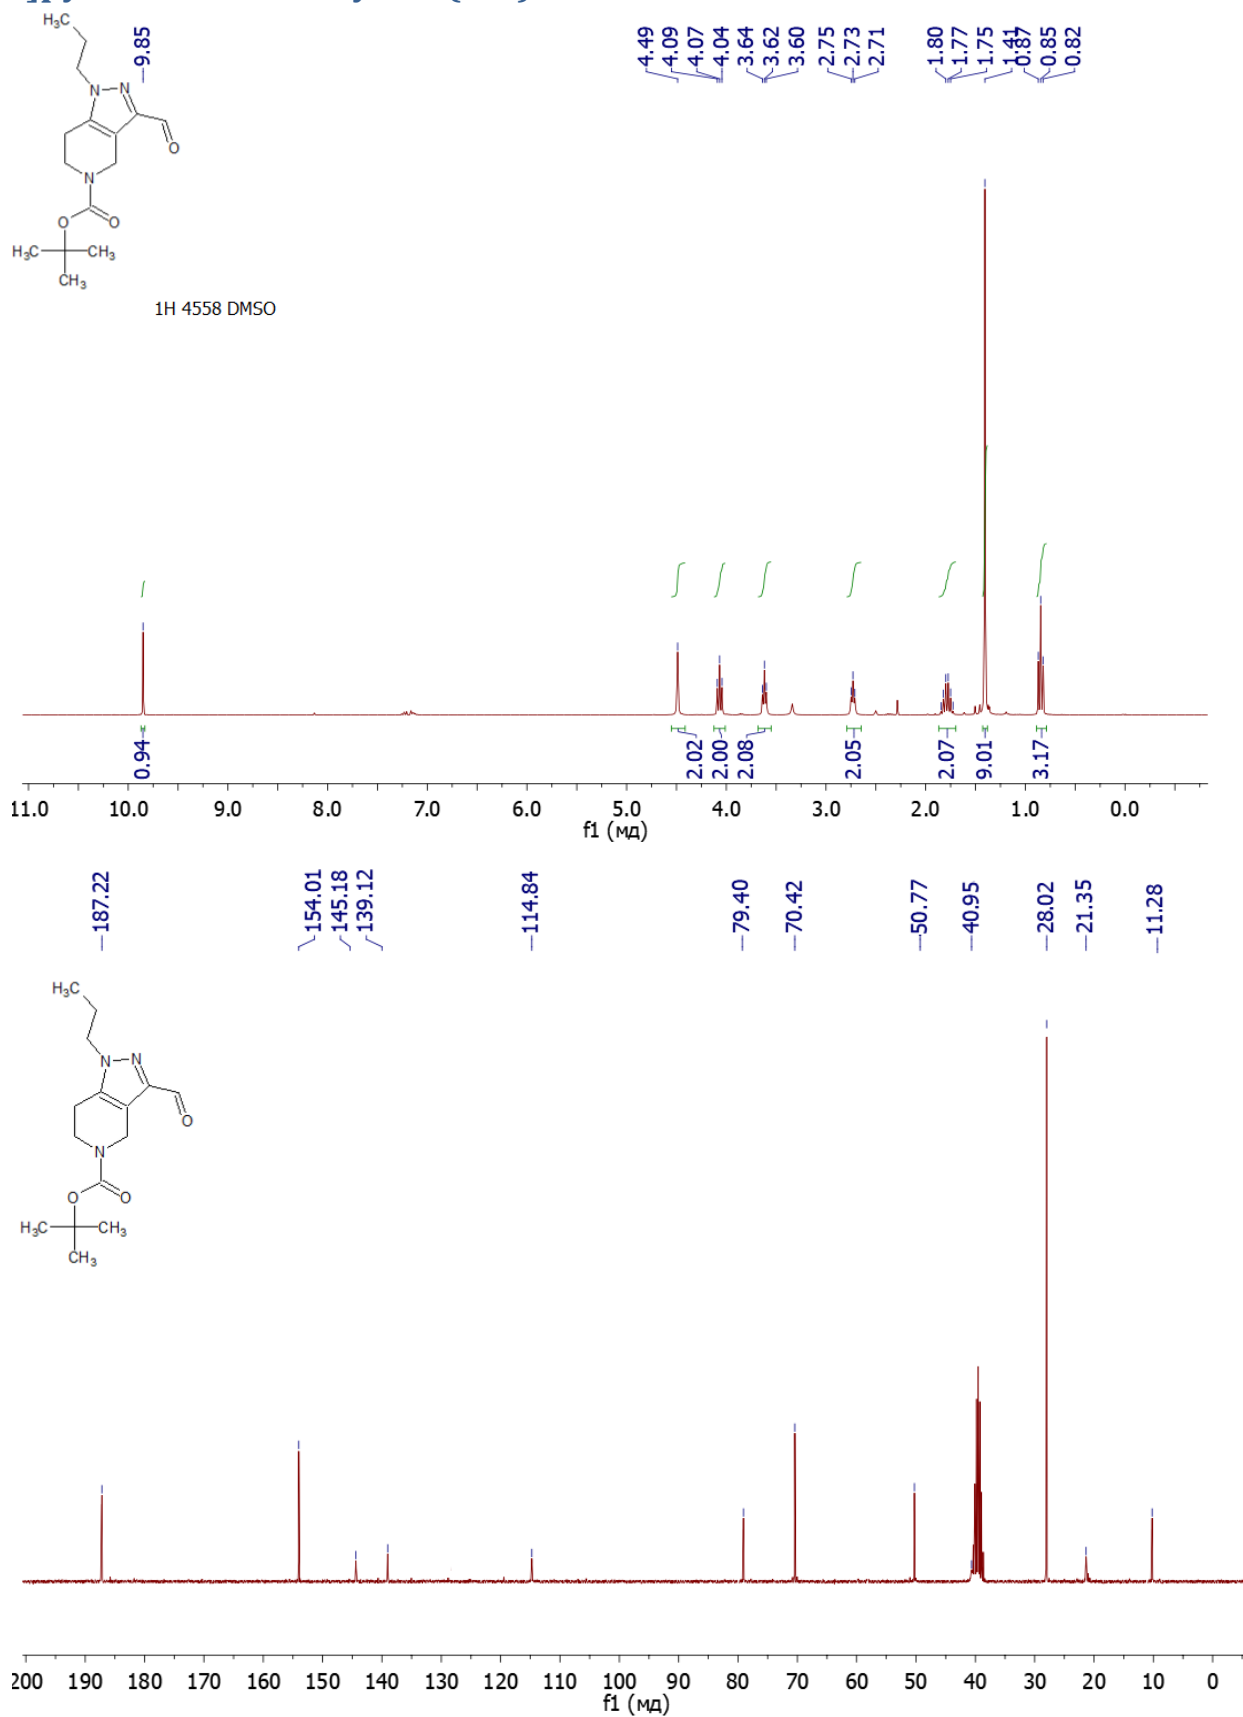



**tert-butyl 3-formyl-1-(2-methoxyethyl)-1,4,6,7-tetrahydro-5H-pyrazolo[4,3-c]pyridine-5-carboxylate (11g)**

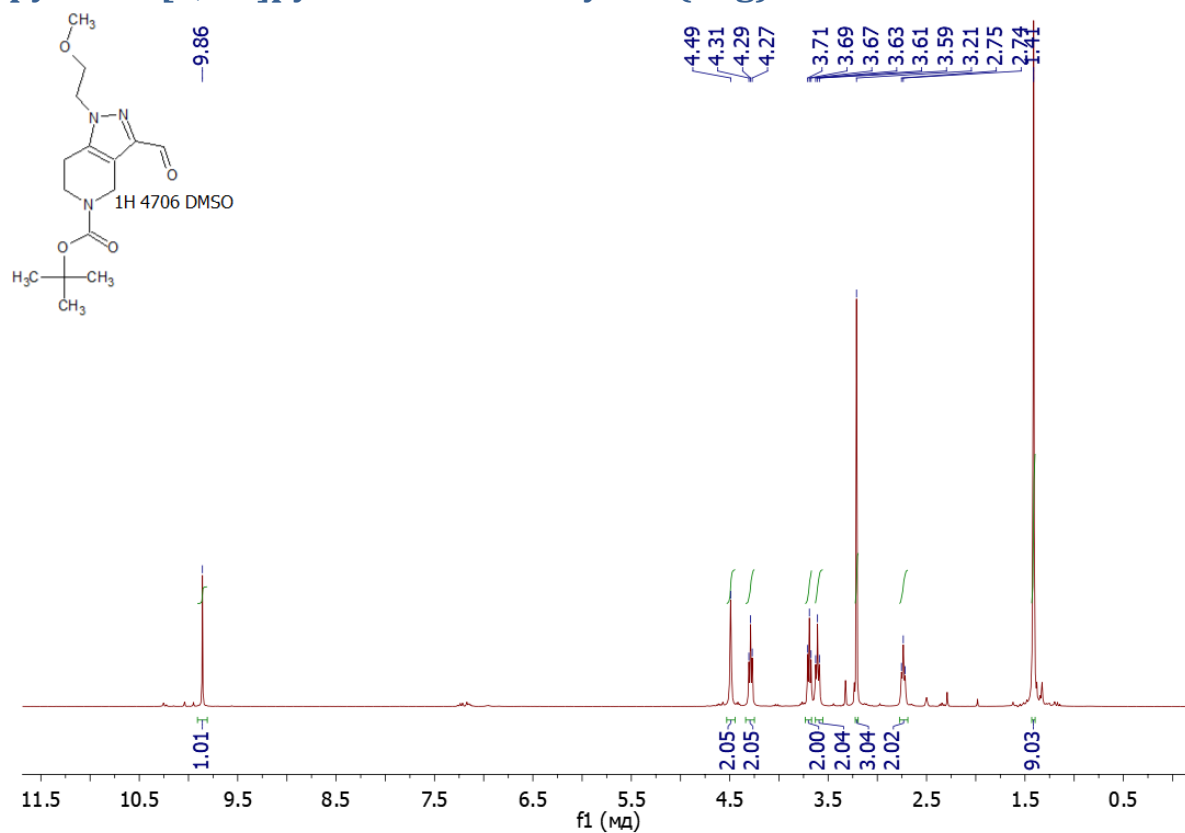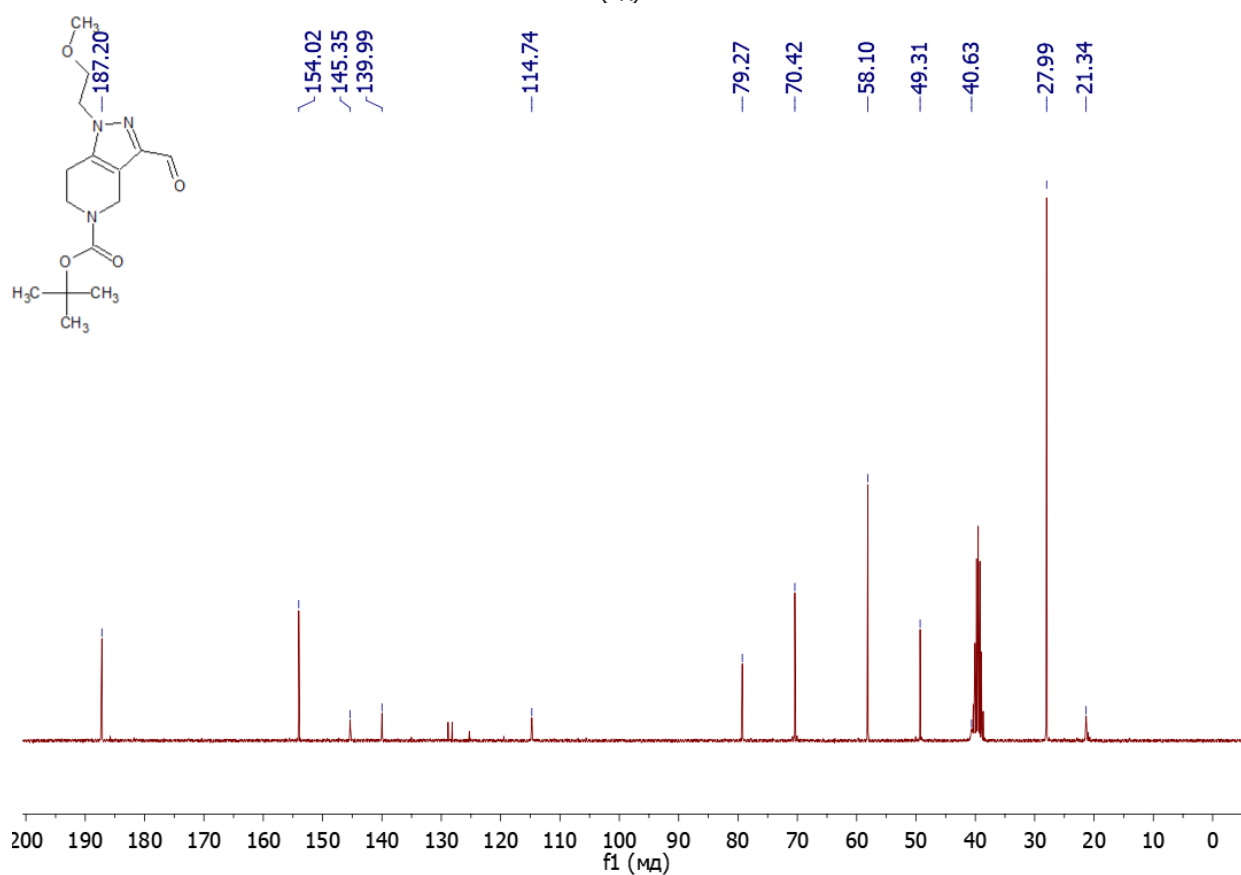

**tert-butyl 3-formyl-1-(3-methoxypropyl)-1,4,6,7-tetrahydro-5H-pyrazolo[4,3-c]pyridine-5-carboxylate (11h)**

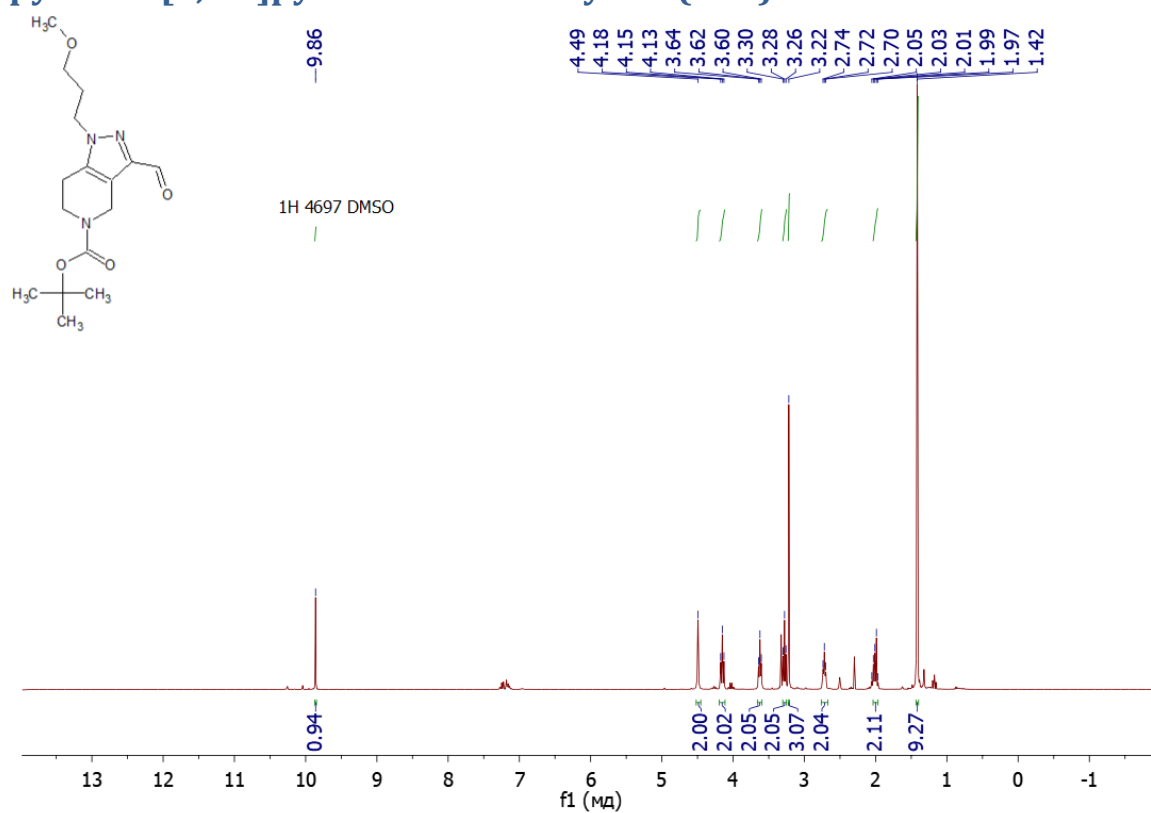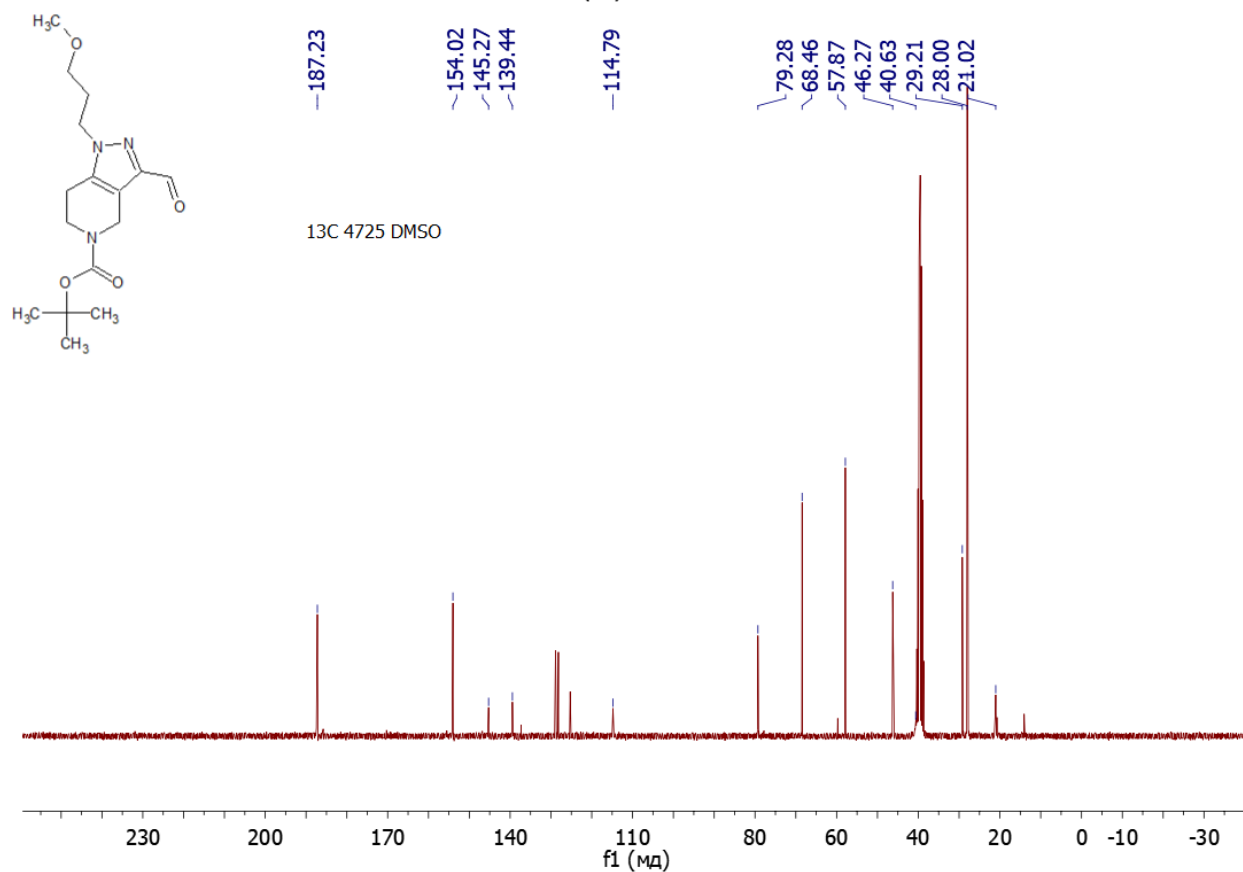

**1-(cyclopropylmethyl)-3-(1,3-oxazol-5-yl)-4,5,6,7-tetrahydro-1H-pyrazolo[4,3-c]pyridine hydrochloride (12e)**

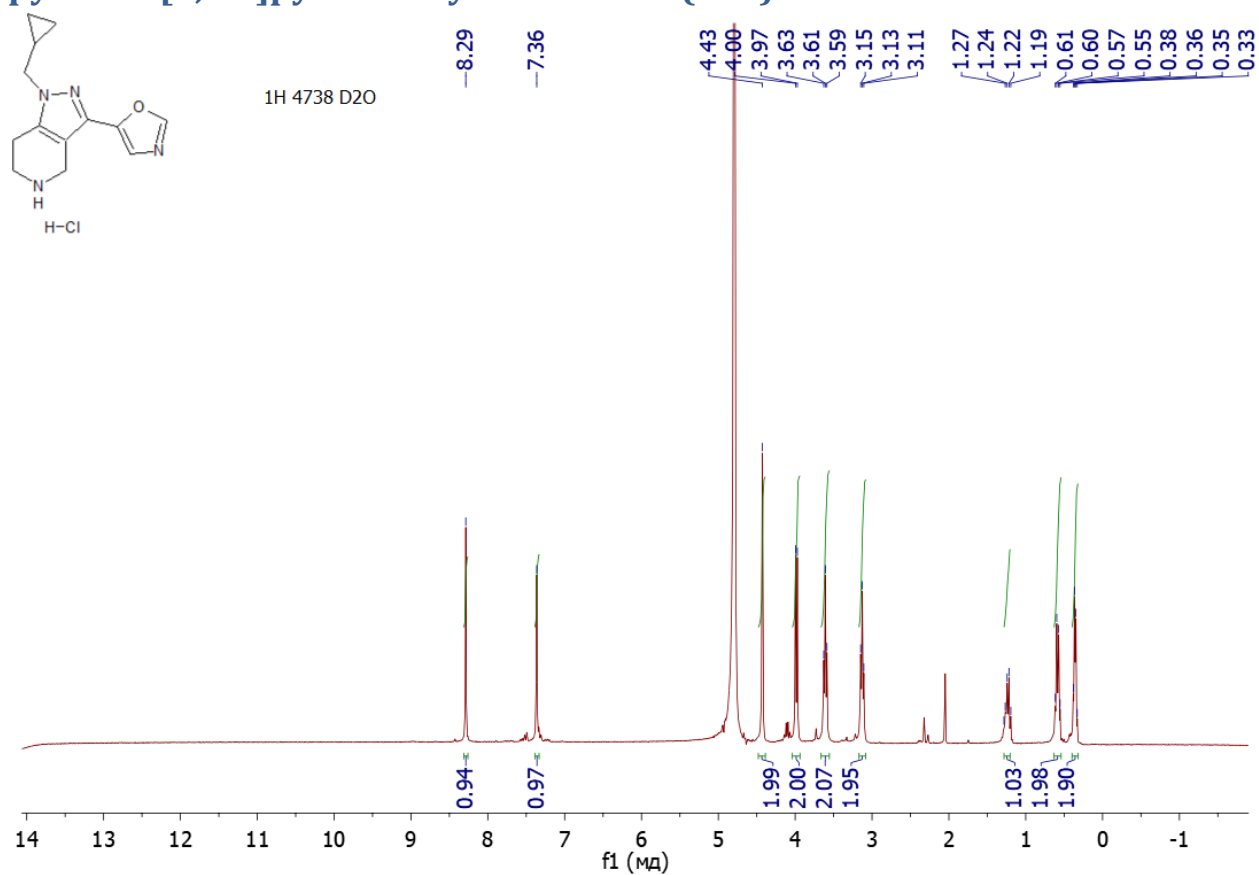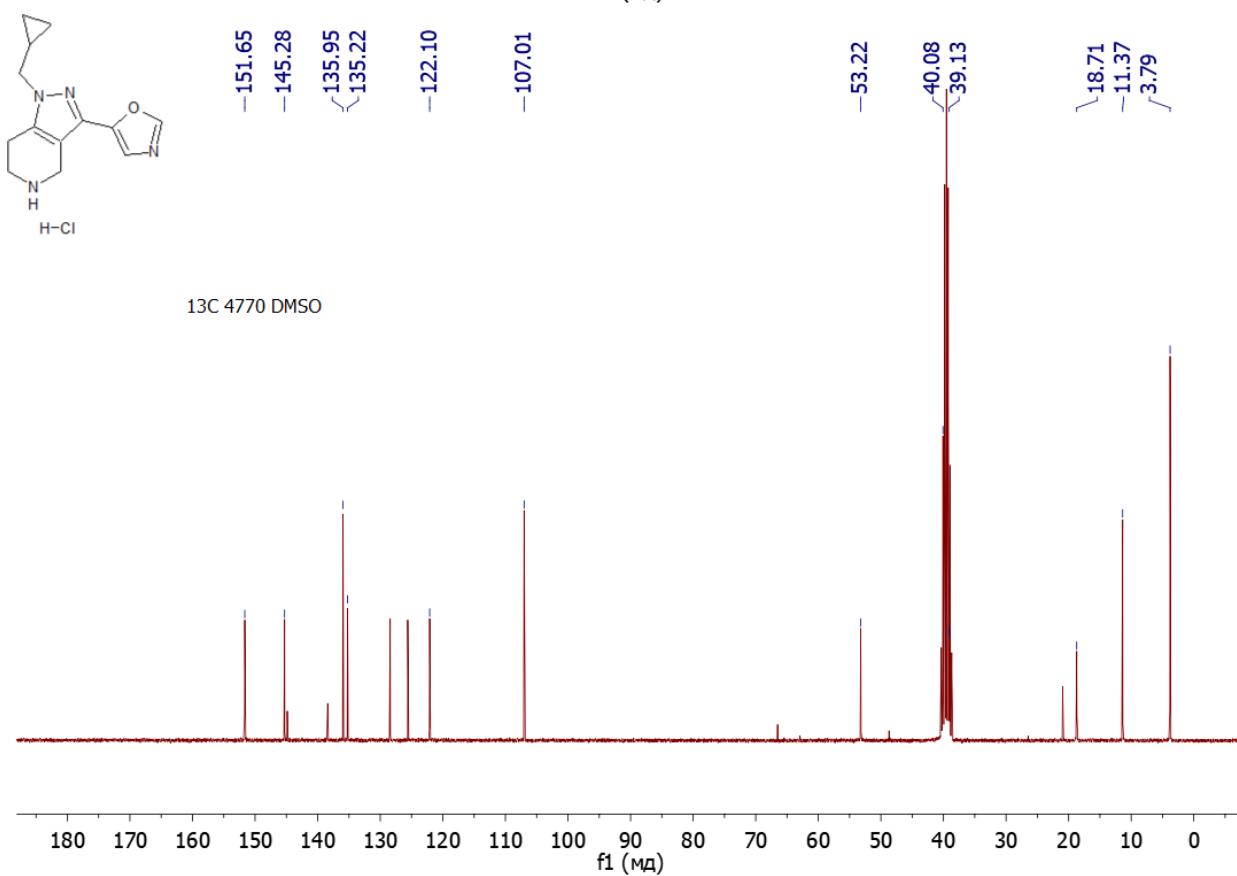

### 3-(1,3-oxazol-5-yl)-1-propyl-4,5,6,7-tetrahydro-1H-pyrazolo[4,3-c]pyridine hydrochloride (12f)

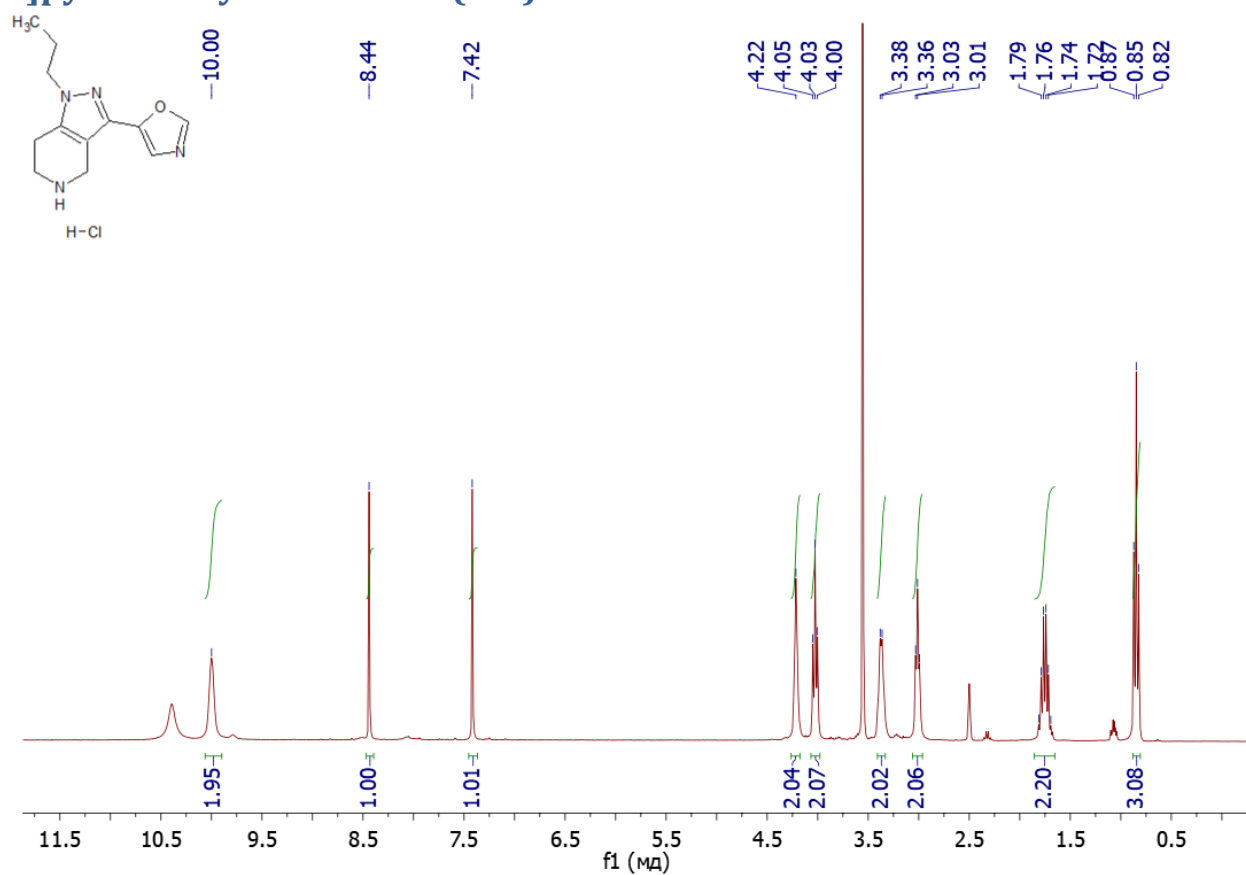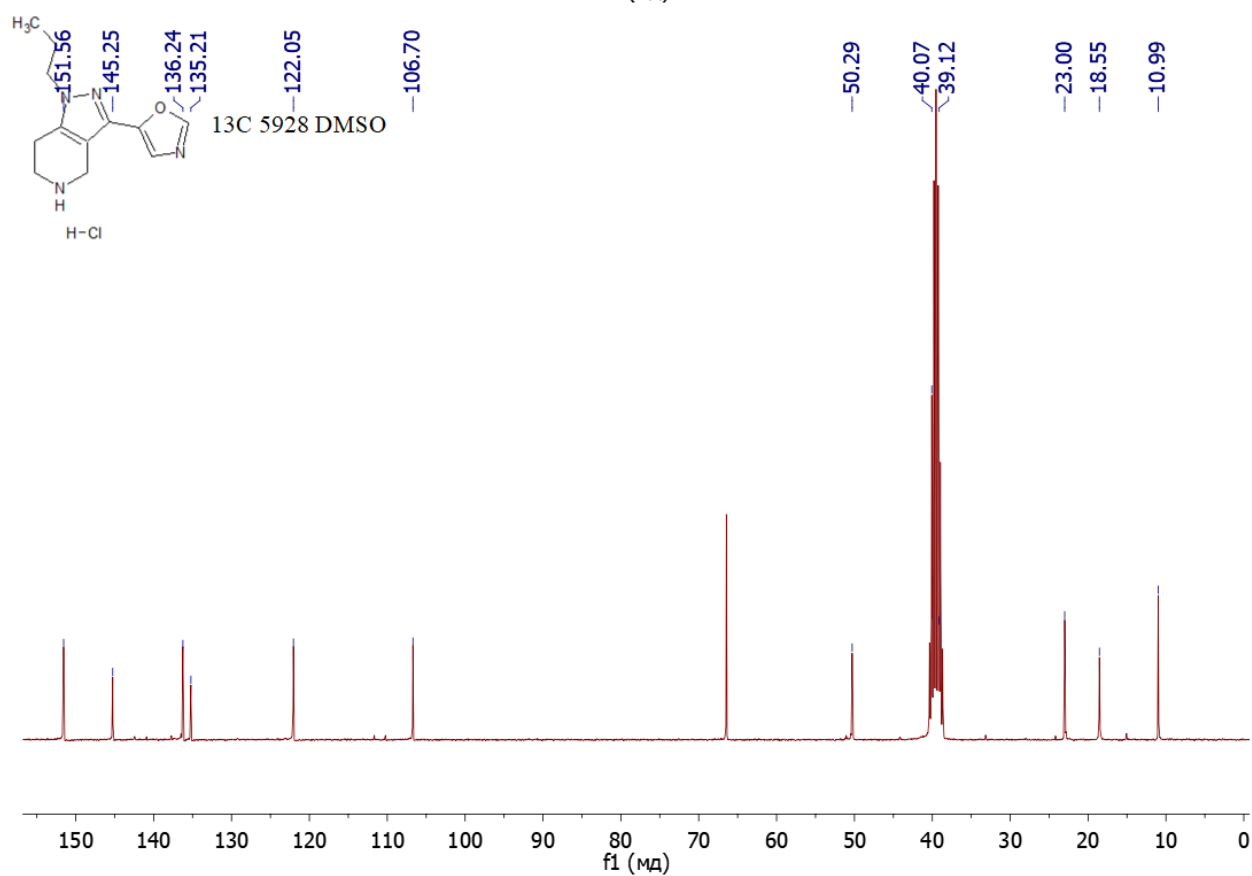

# 1-(2-methoxyethyl)-3-(1,3-oxazol-5-yl)-4,5,6,7-tetrahydro-1H-pyrazolo[4,3-c]pyridine hydrochloride (12g)

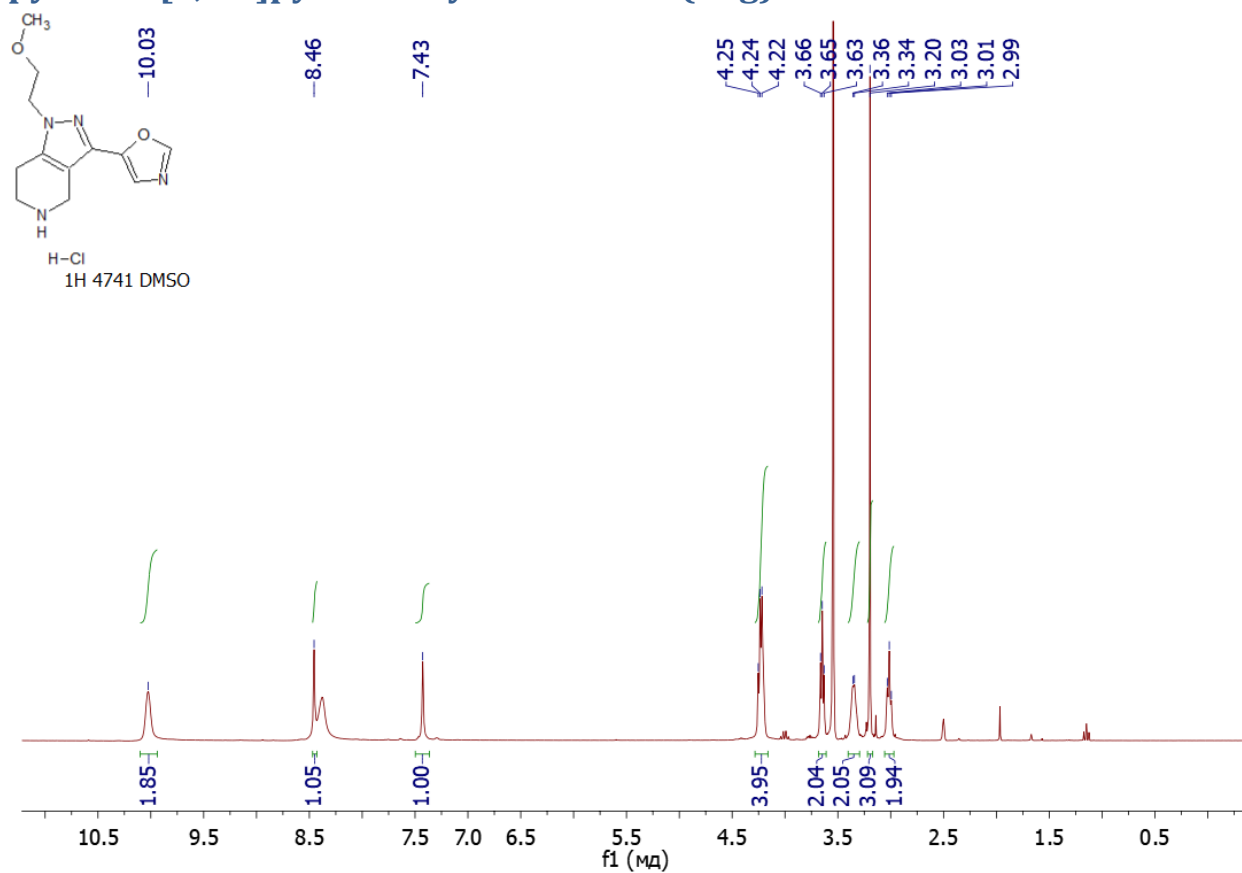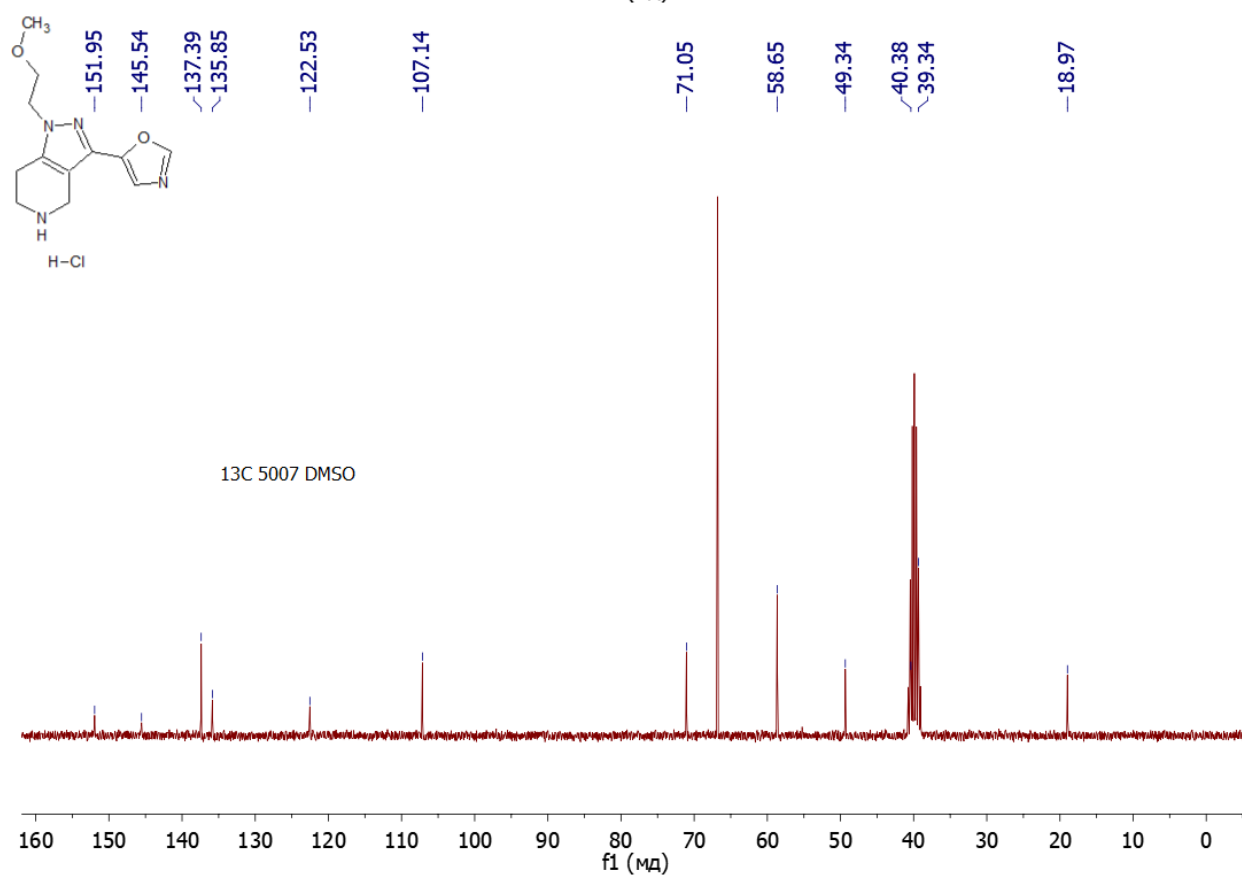

# 1-(3-methoxypropyl)-3-(1,3-oxazol-5-yl)-4,5,6,7-tetrahydro-1H-pyrazolo[4,3-c]pyridine hydrochloride (12h)

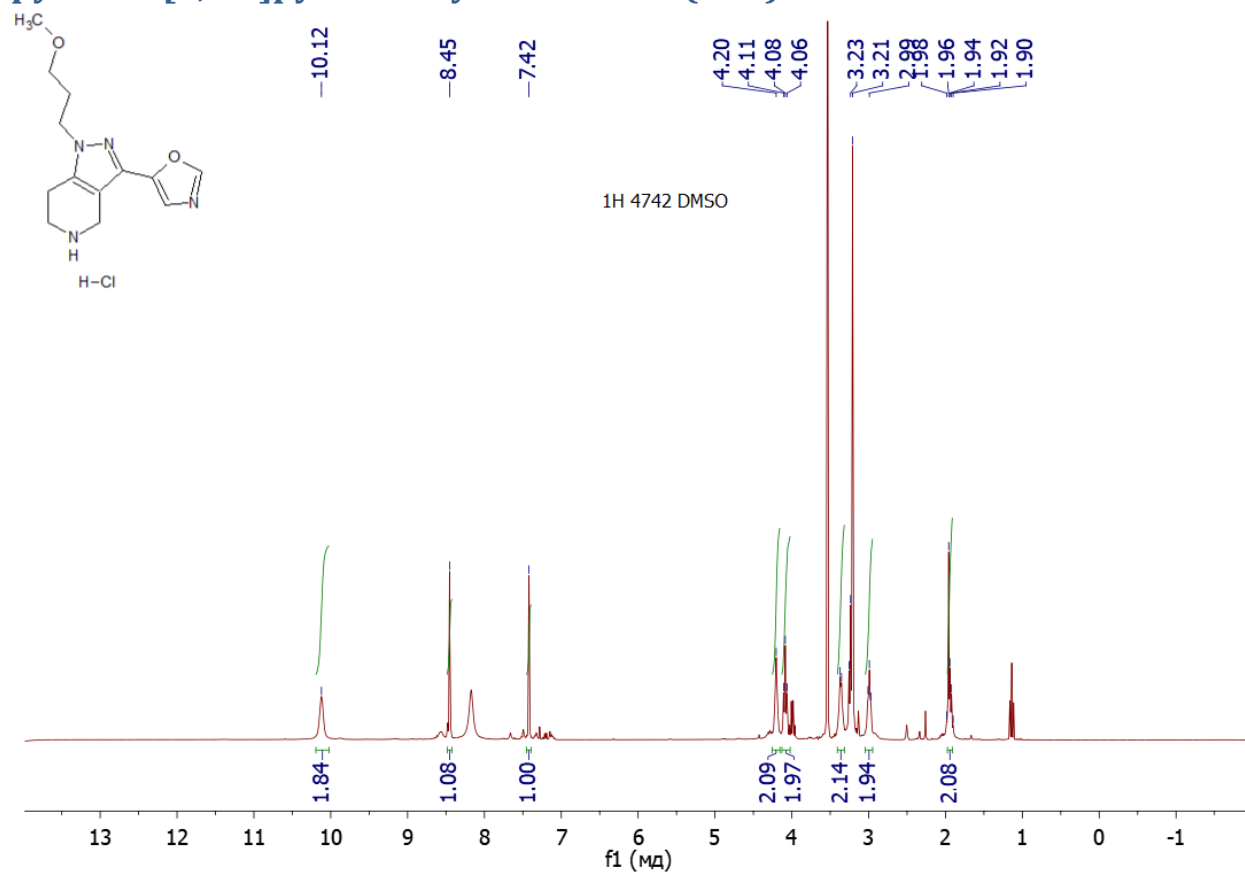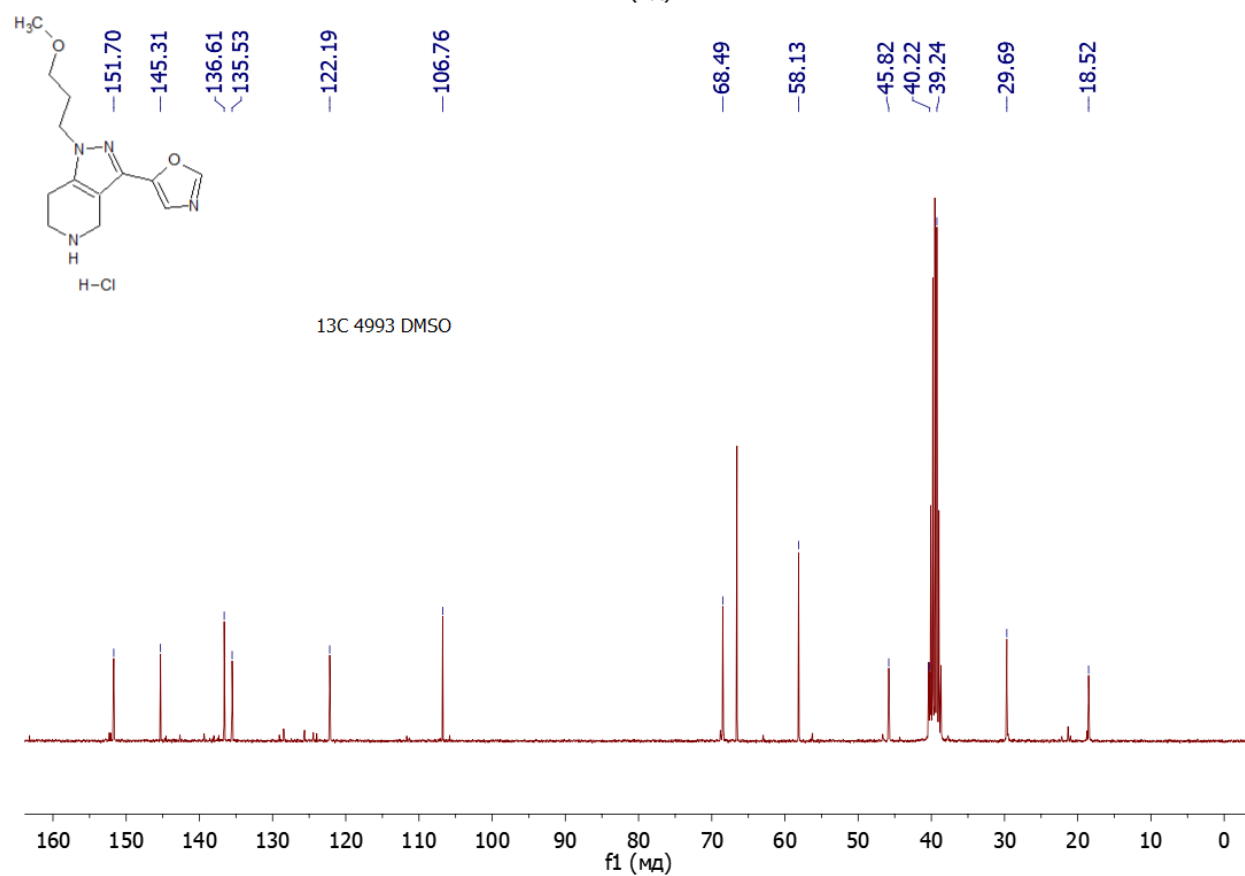

# 1-methyl-3-(5-methyl-1,3-oxazol-2-yl)-5-(5-nitro-2-furoyl)-4,5,6,7-tetrahydro-1H-pyrazolo [4,3-c]pyridine, LK01510 (10a)

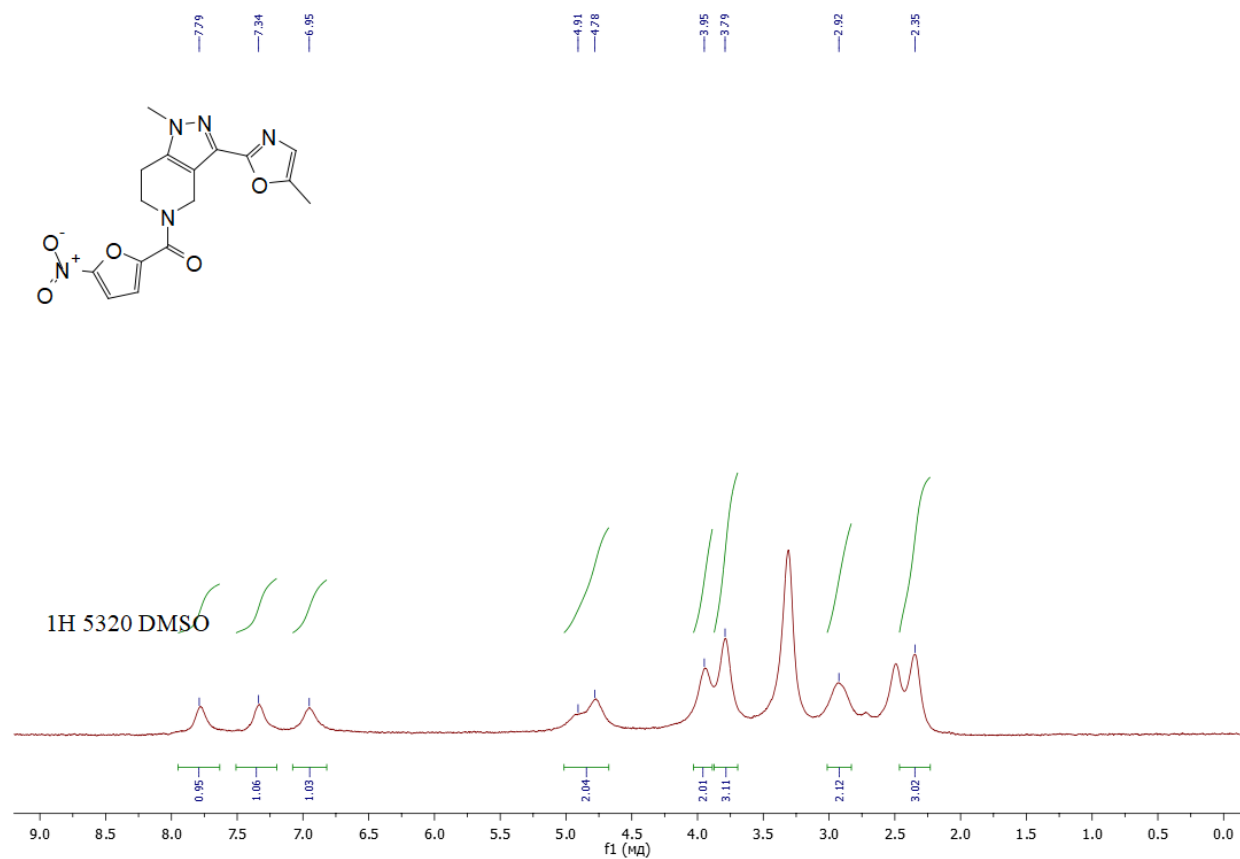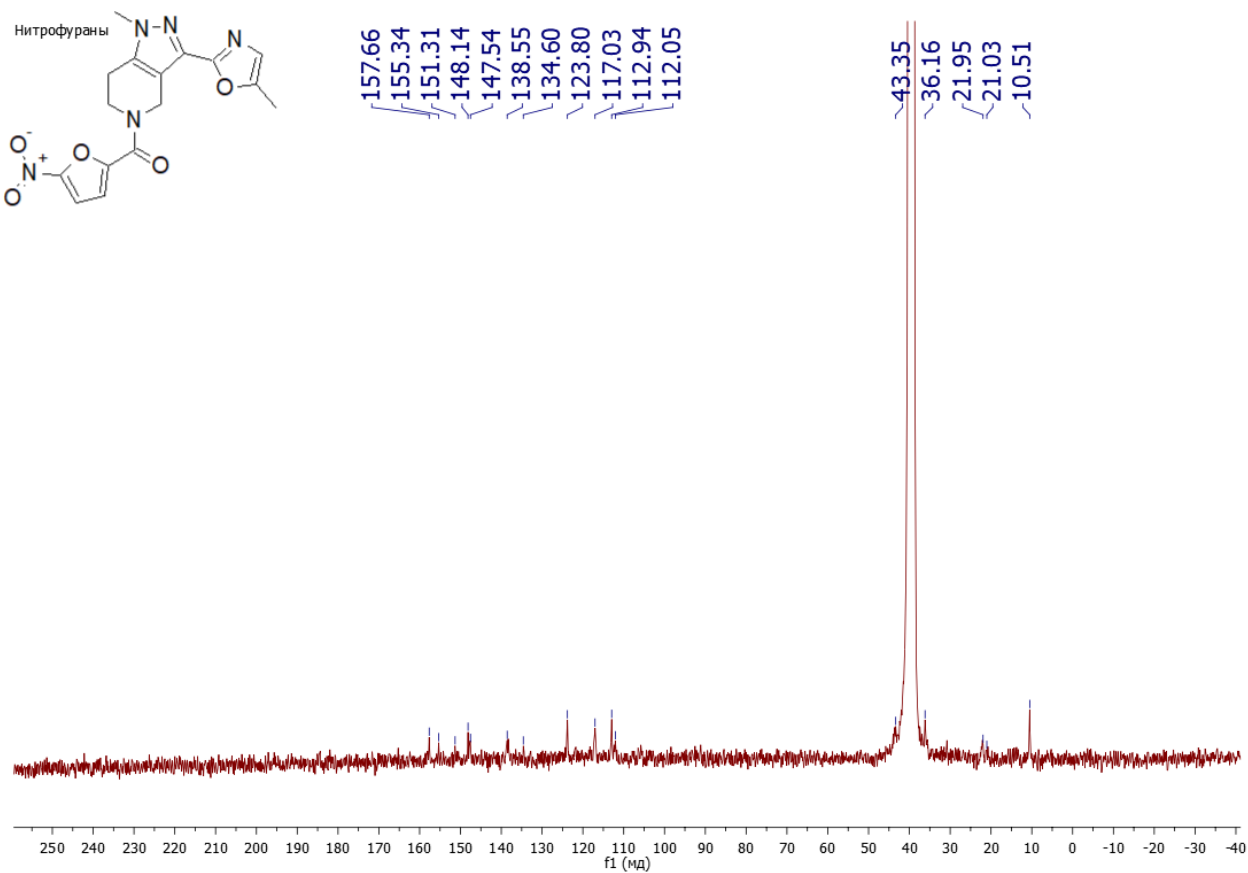

# 1-ethyl-3-(5-methyl-1,3-oxazol-2-yl)-5-(5-nitro-2-furoyl)-4,5,6,7-tetrahydro-1H-pyrazolo [4,3-c]pyridine, LK01511 (10b)

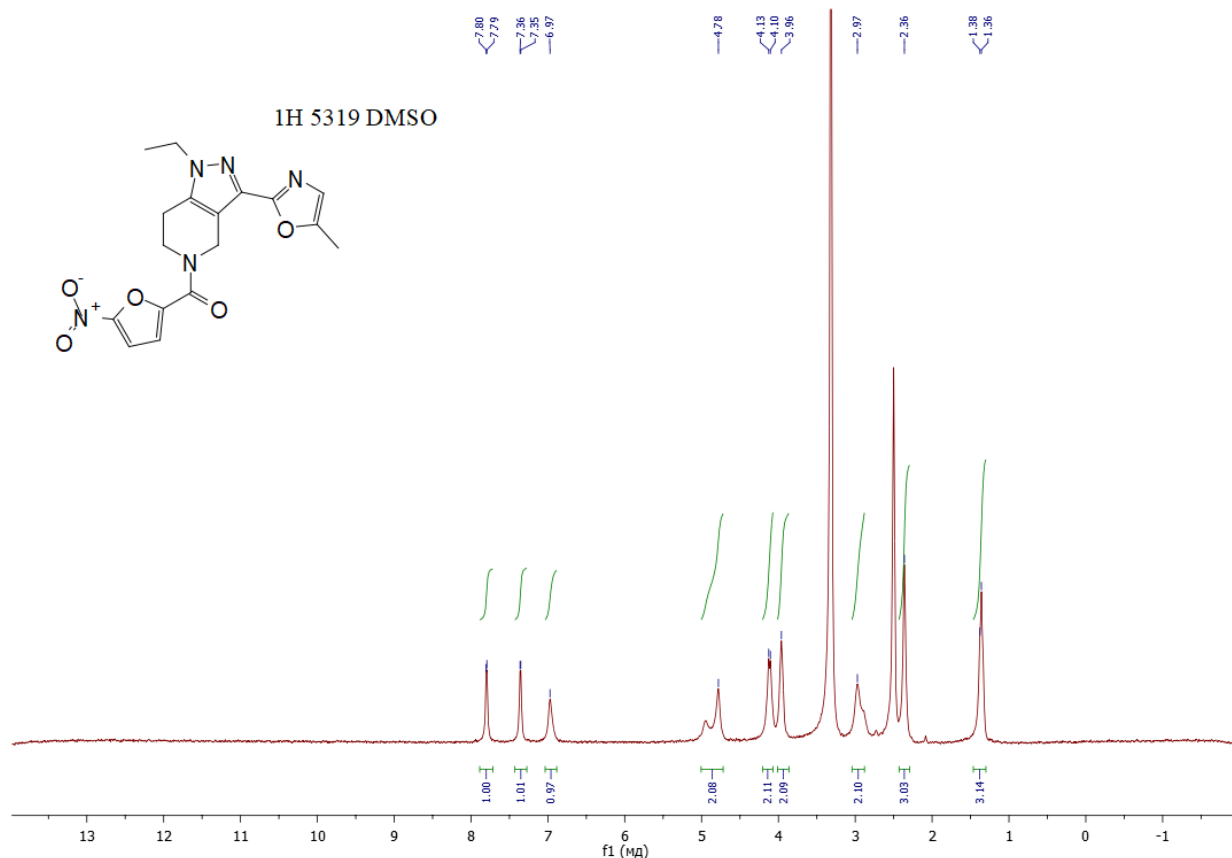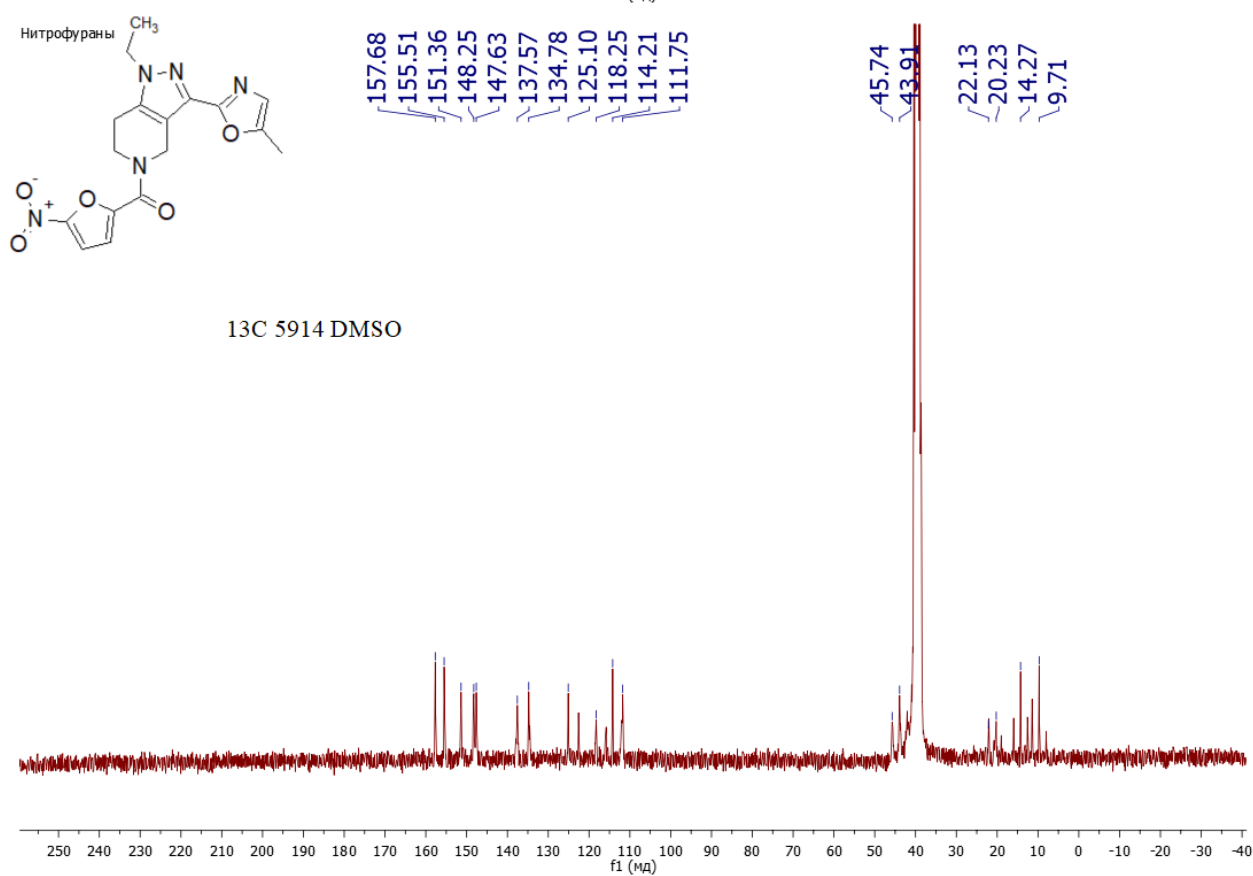



# 1-isopropyl-3-(5-methyl-1,3-oxazol-2-yl)-5-(5-nitro-2-furoyl)-4,5,6,7-tetrahydro-1H-pyrazolo [4,3-c]pyridine, LK01515 (10c)

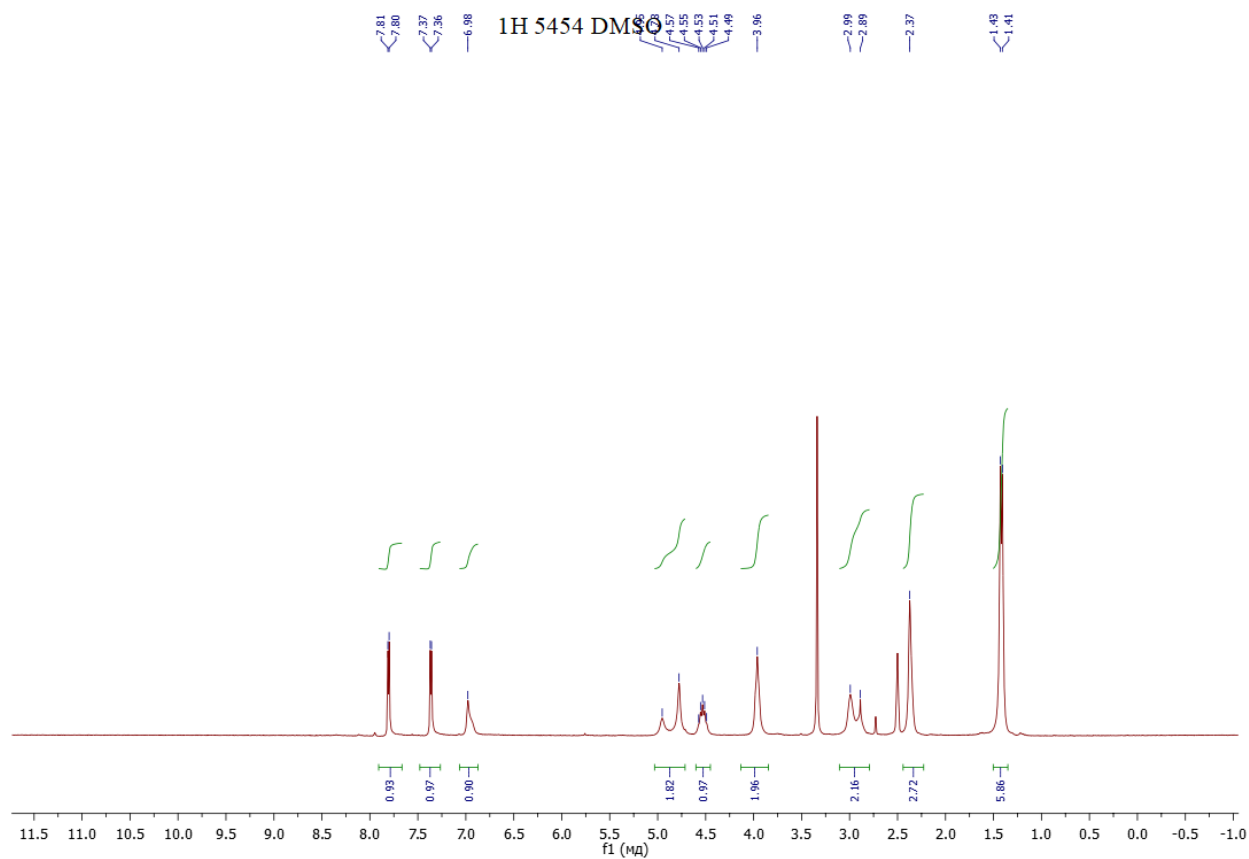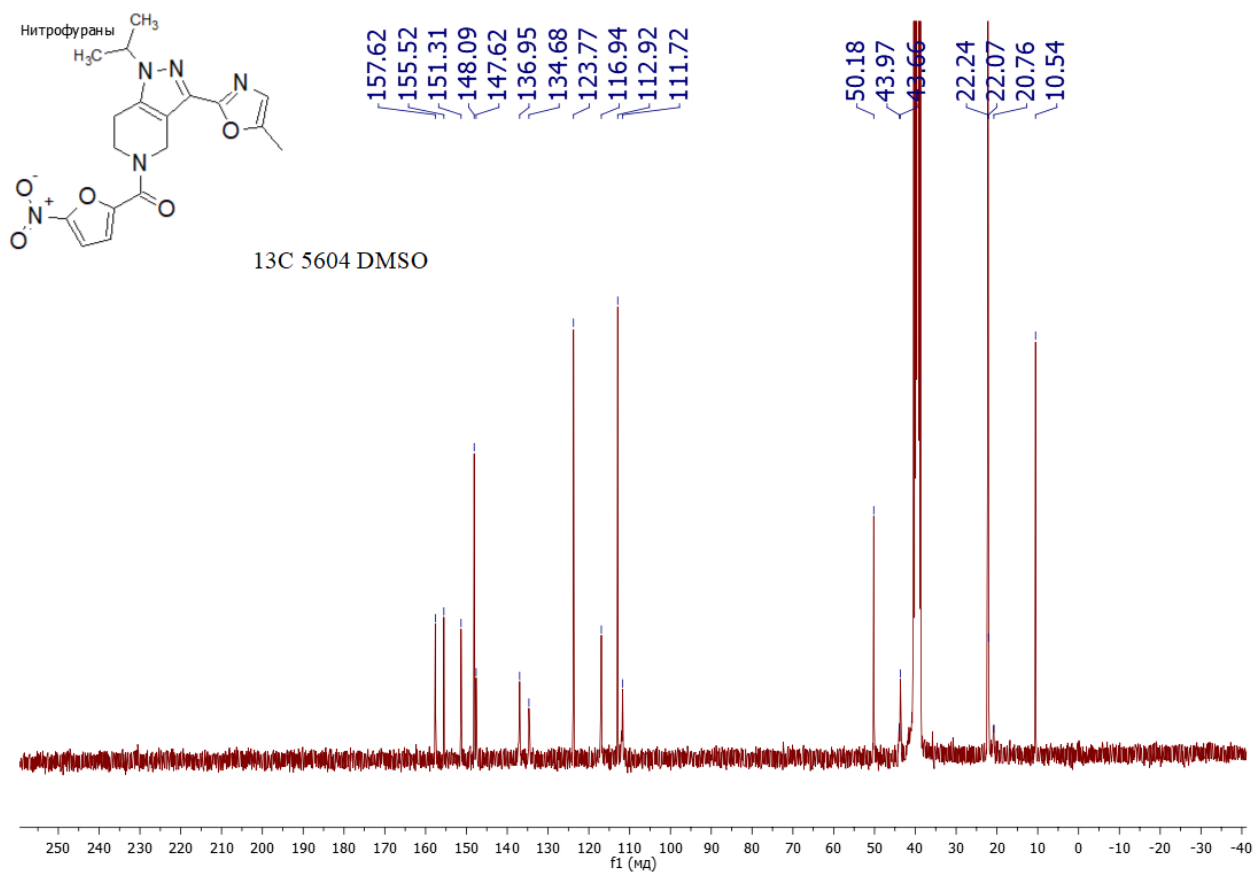

# 1-isobutyl-3-(5-methyl-1,3-oxazol-2-yl)-5-(5-nitro-2-furoyl)-4,5,6,7-tetrahydro-1H-pyrazolo [4,3-c]pyridine, LK01516 (10d)

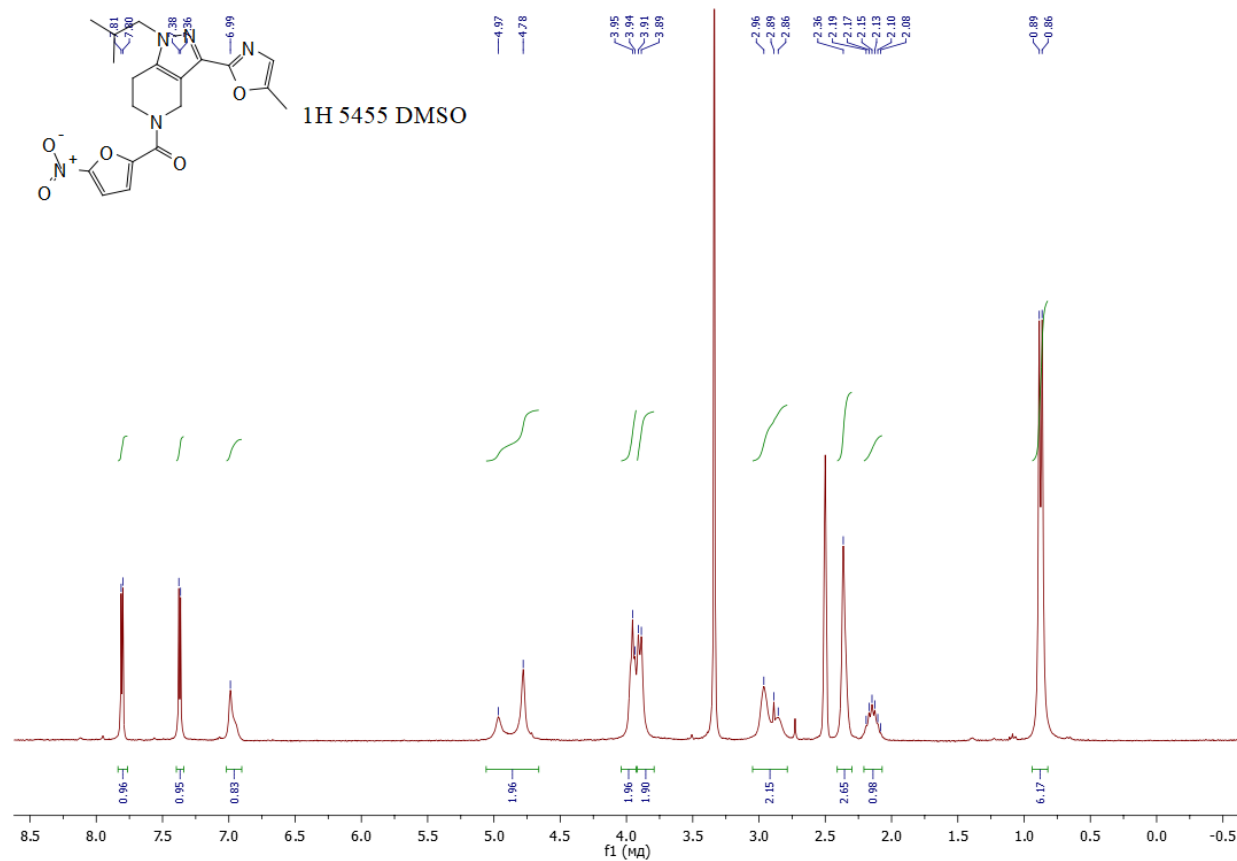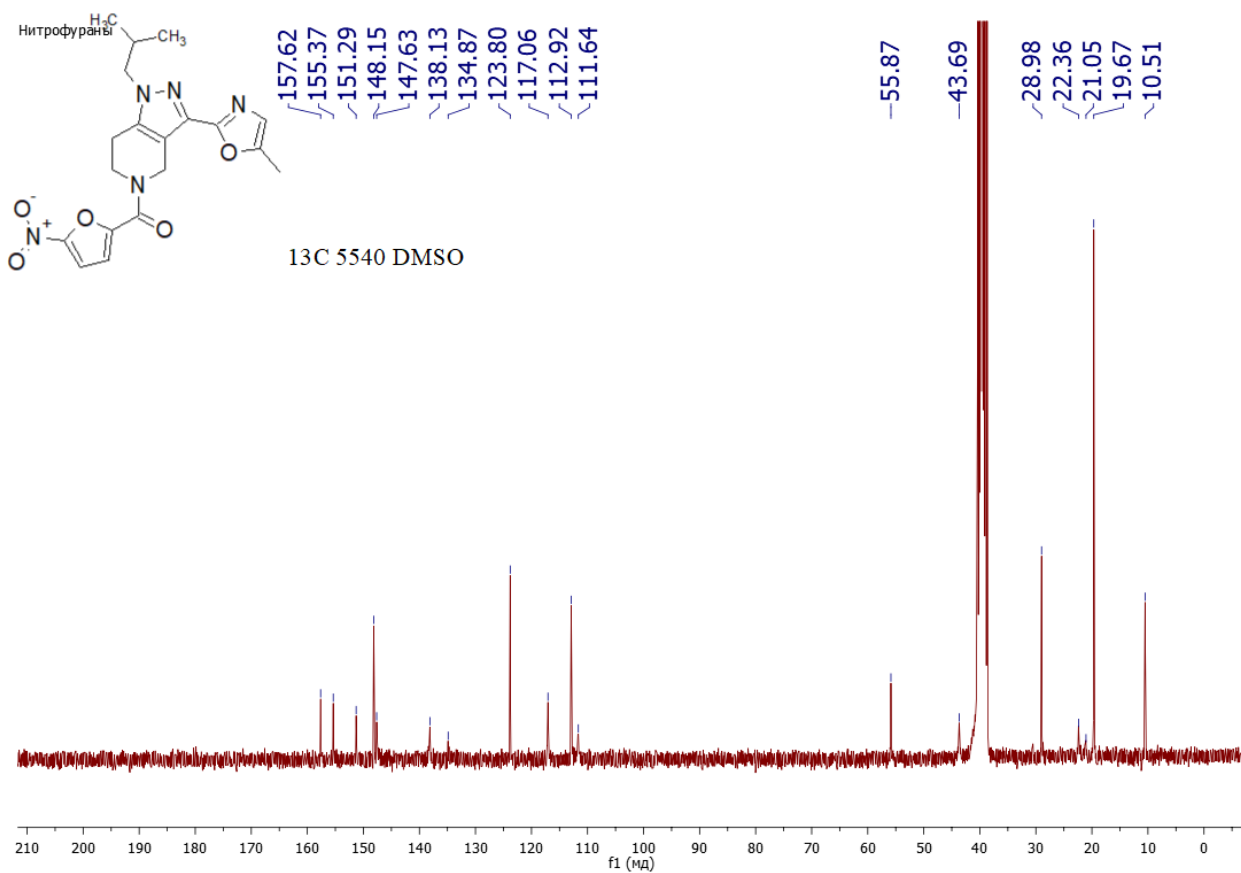

**1-(cyclopropylmethyl)-5-(5-nitro-2-furoyl)-3-(1,3-oxazol-5-yl)-4,5,6,7-tetrahydro-1H-pyrazolo [4,3-c]pyridine, LK01512 (13e)**

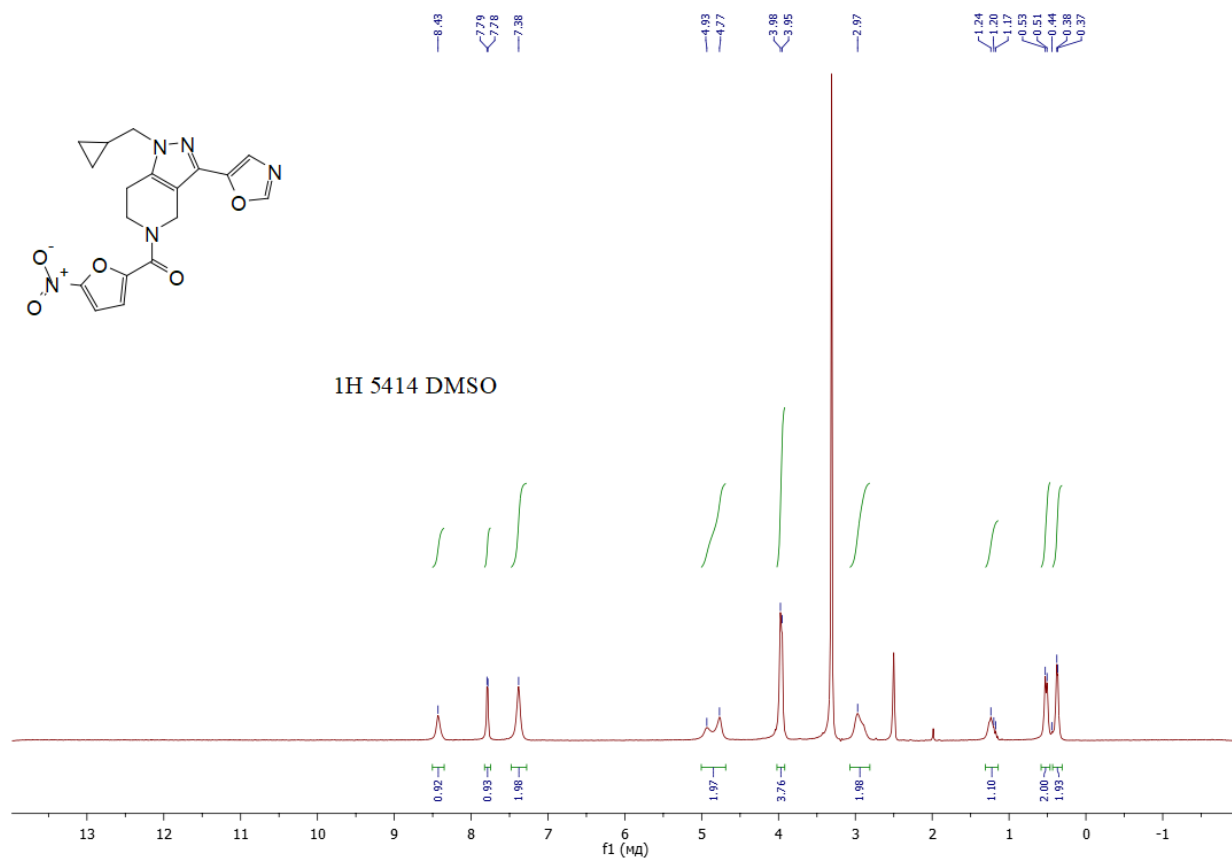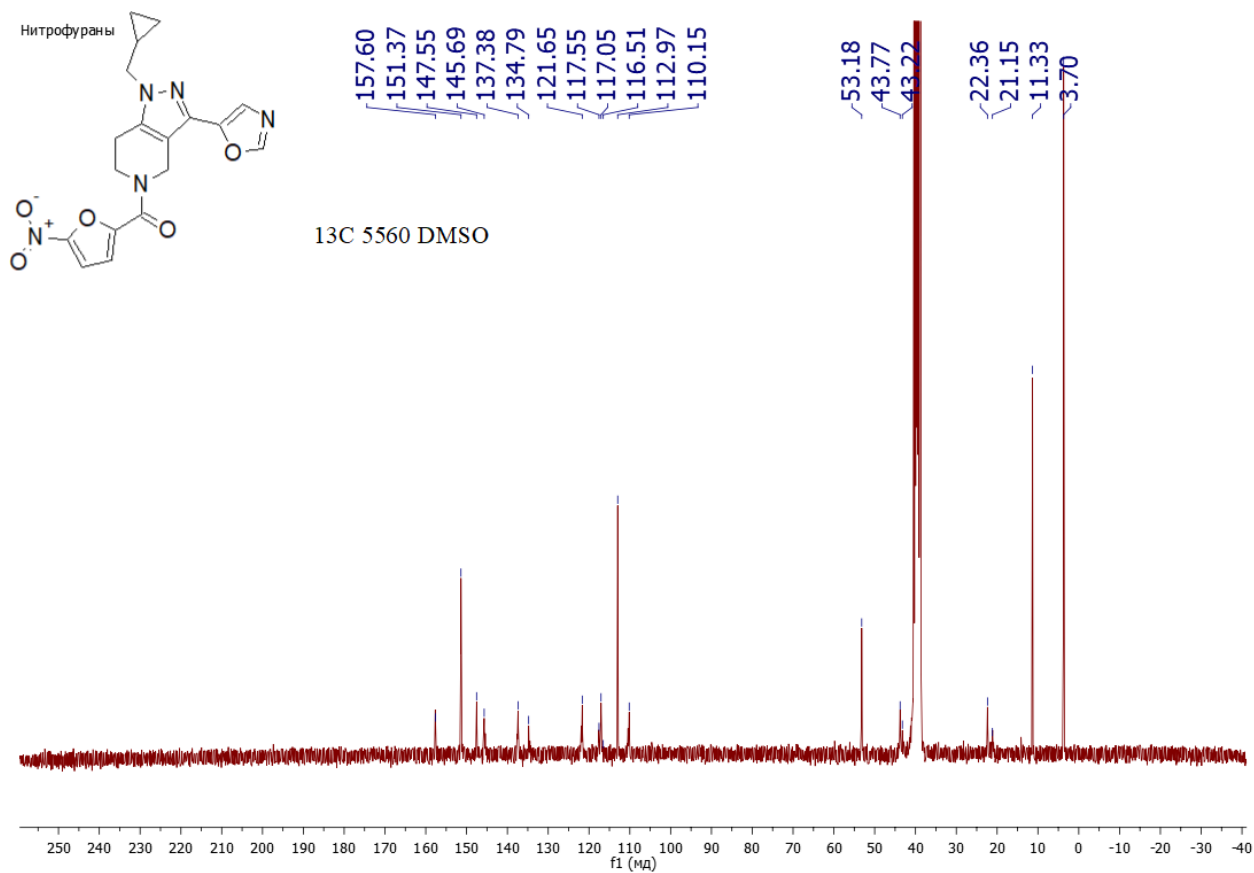

# 5-(5-nitro-2-furoyl)-3-(1,3-oxazol-5-yl)-1-propyl-4,5,6,7-tetrahydro-1H-pyrazolo[4,3-c]pyridine, LK01513 (13f)

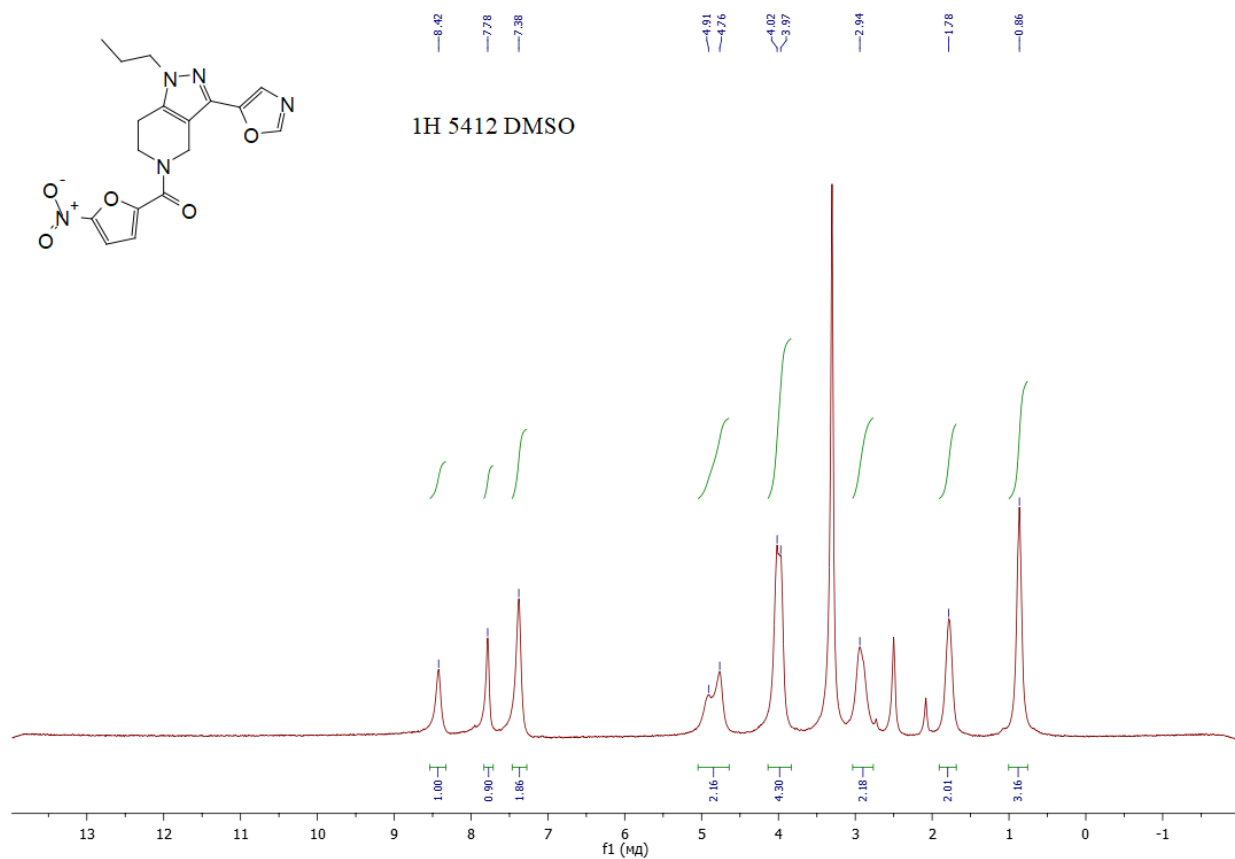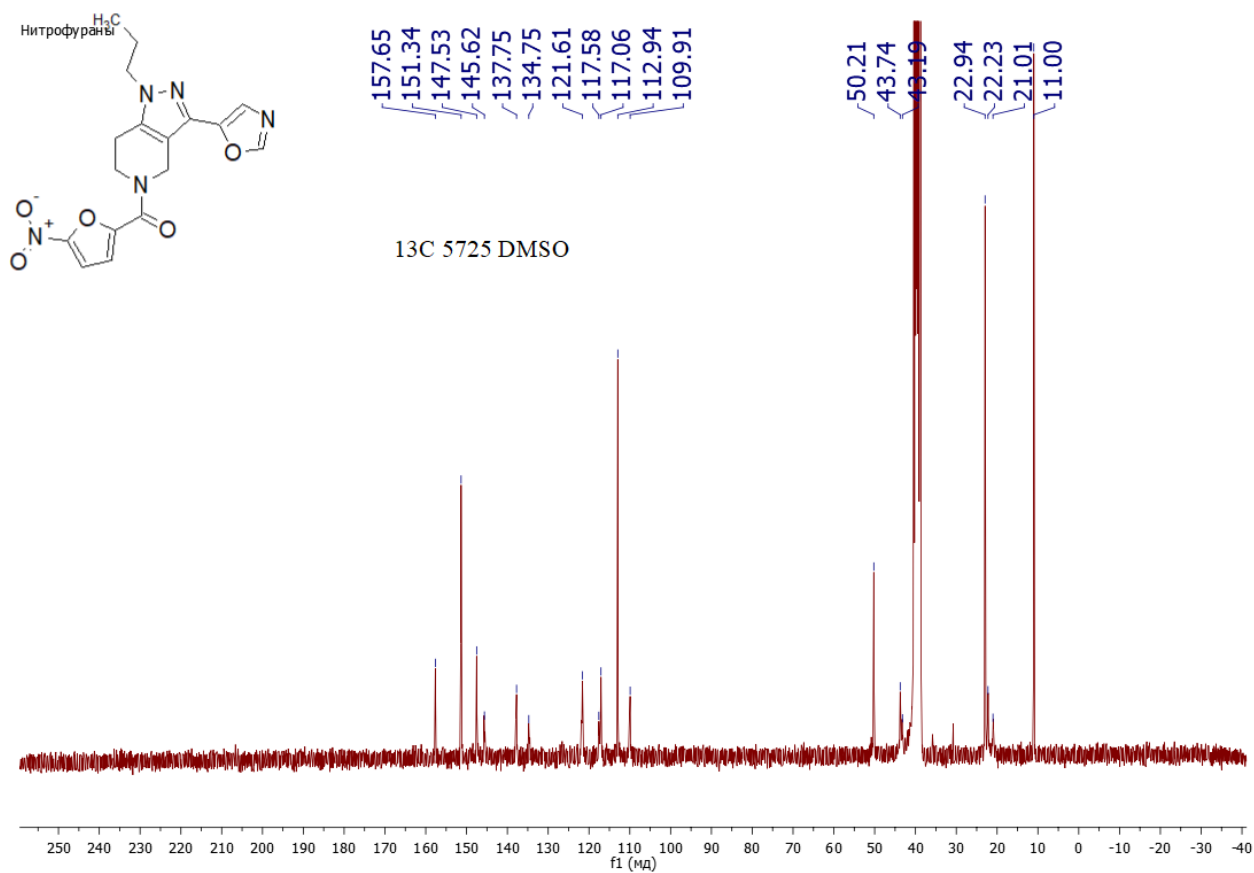

**1-(2-methoxyethyl)-5-(5-nitro-2-furoyl)-3-(1,3-oxazol-5-yl)-4,5,6,7-tetrahydro-1H-pyrazolo [4,3-c]pyridine, LK01509 (13g)**

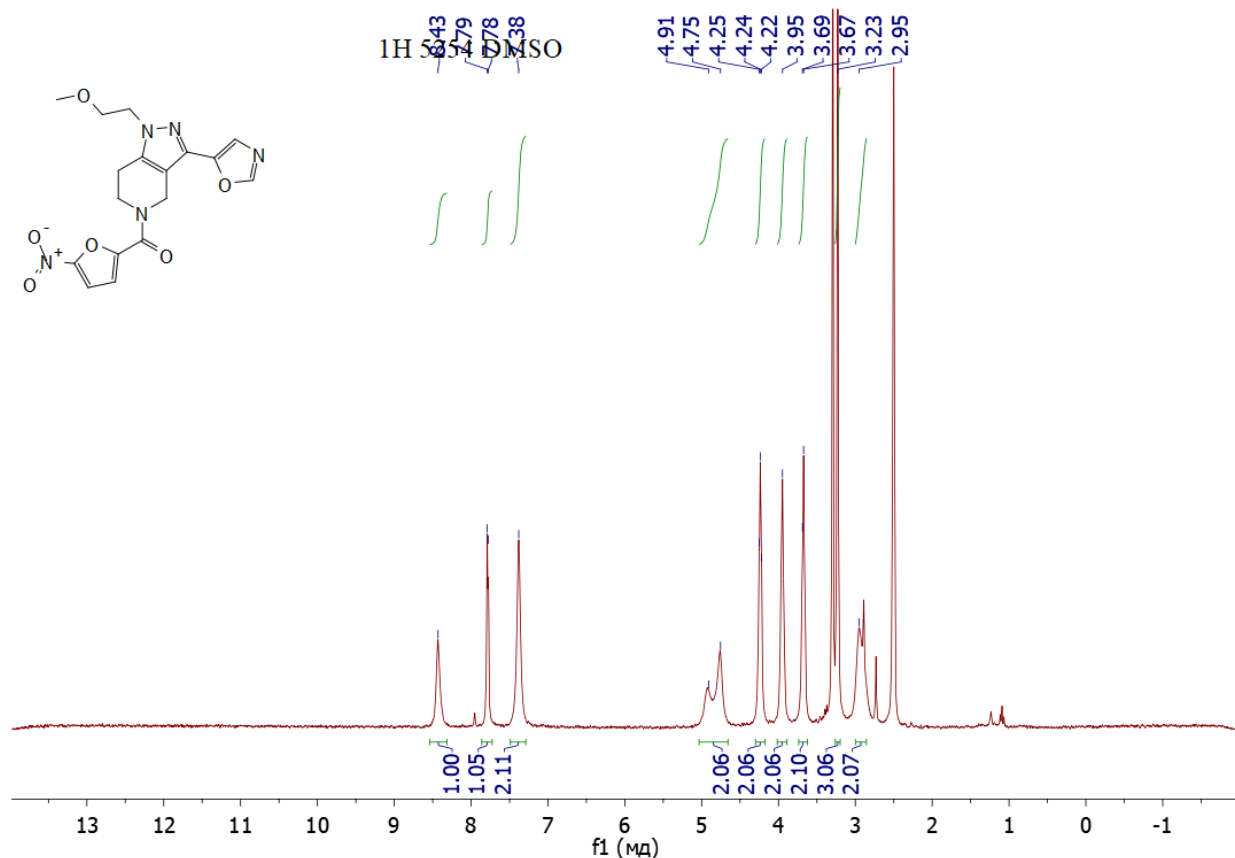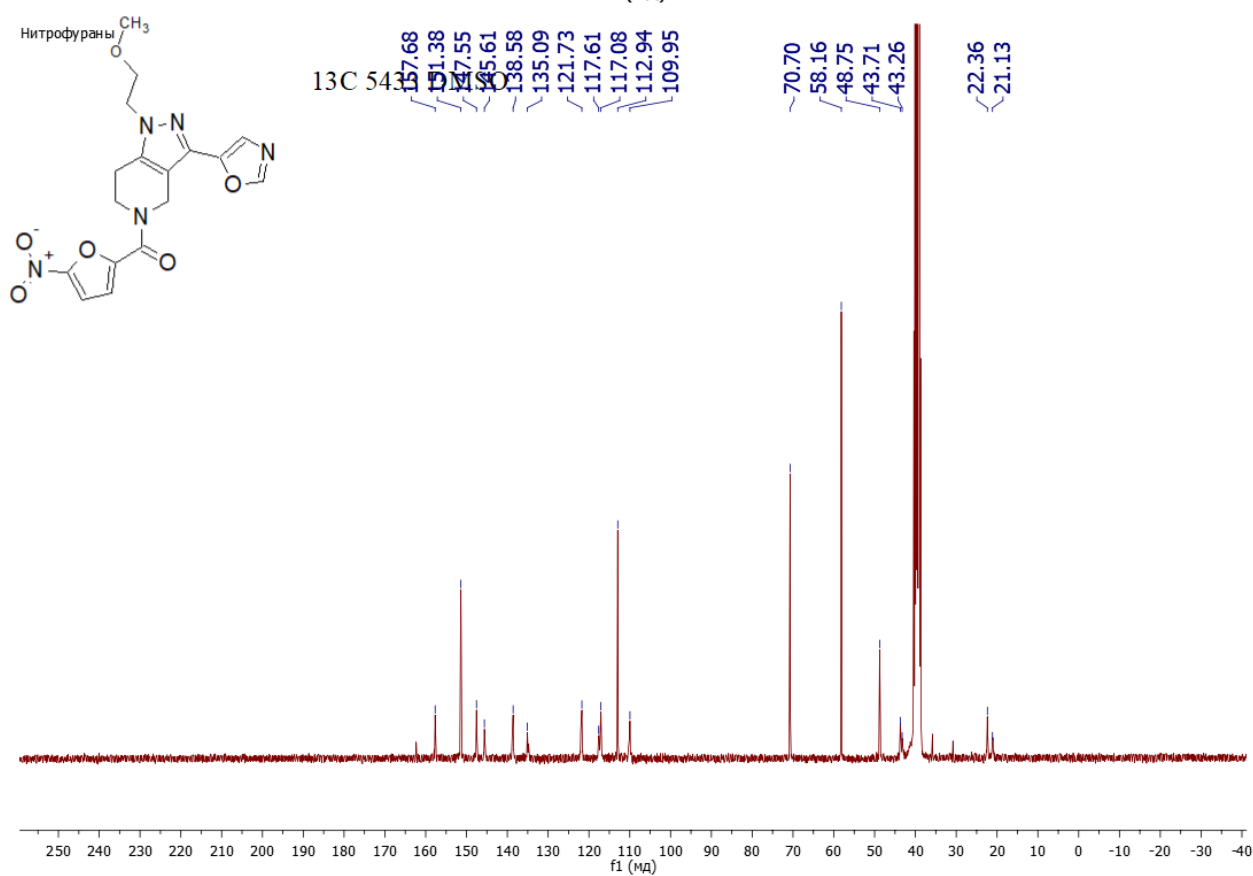

# 1-(3-methoxypropyl)-5-(5-nitro-2-furoyl)-3-(1,3-oxazol-5-yl)-4,5,6,7-tetrahydro-1H-pyrazolo [4,3-c]pyridine, LK01514 (13h)

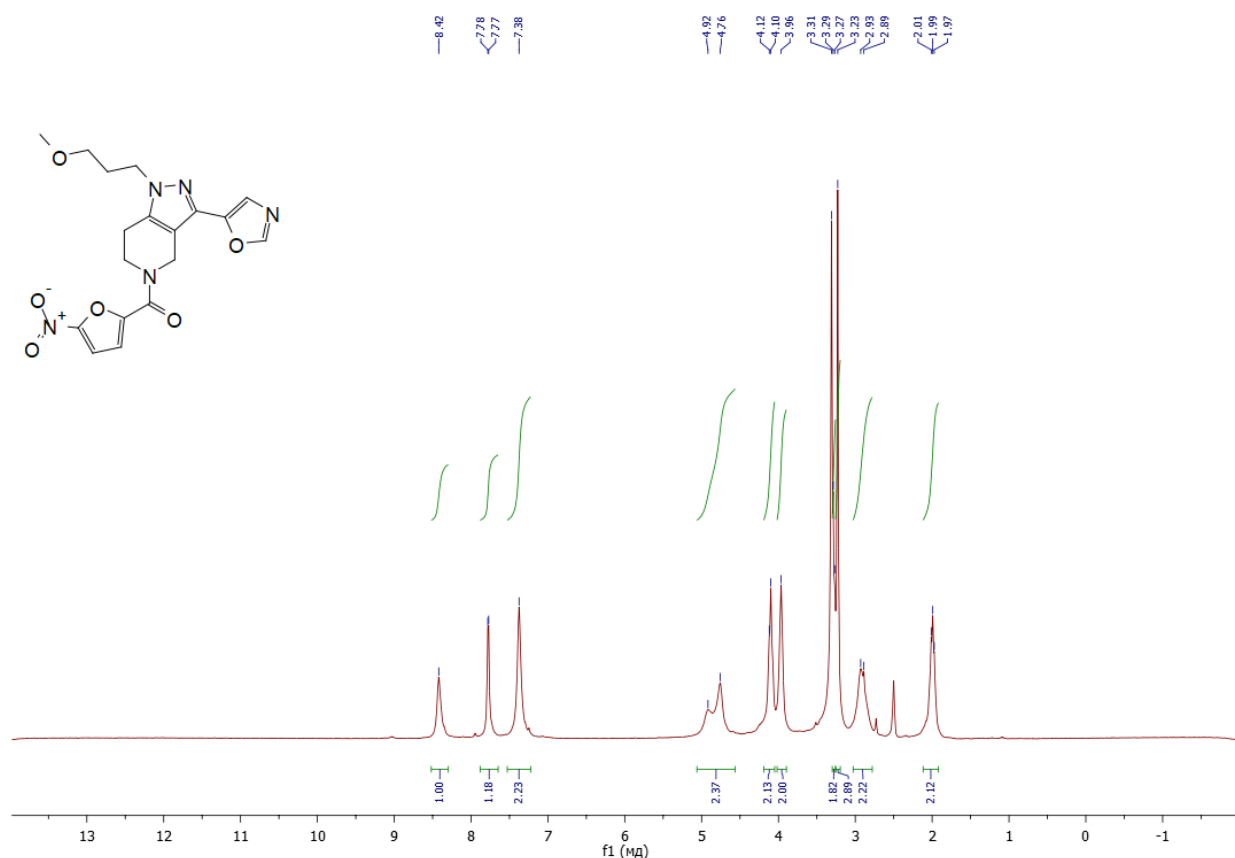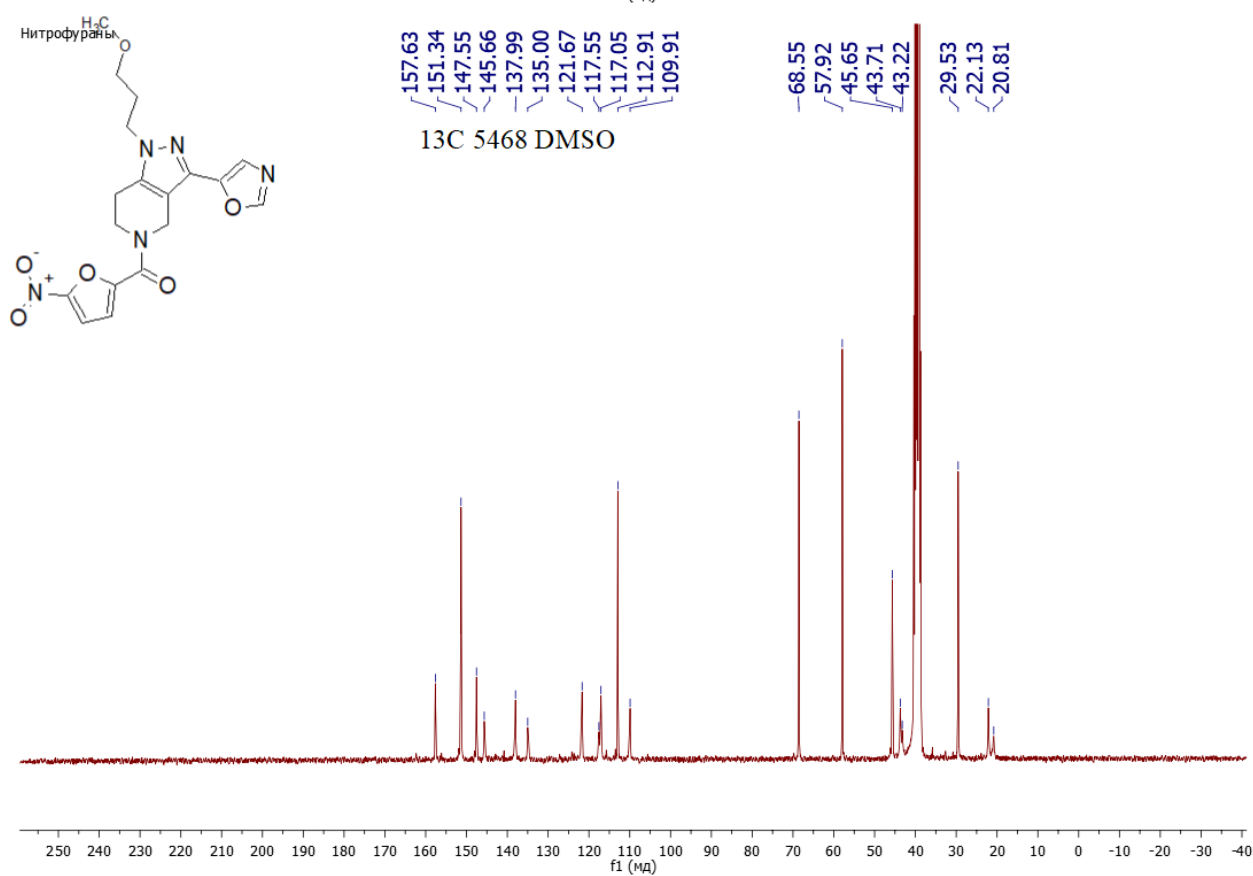

Supplement: s1 [file s1]
